# Supplementary material for: Epidural analgesia in critically ill patients with acute pancreatitis: the multicentre randomised controlled EPIPAN study protocol
Source: PubMed Central journal article supplement — BMJ Open. 2017 May 29;7(5):e015280. doi: 10.1136/bmjopen-2016-015280 (PMC5730003; doi:10.1136/bmjopen-2016-015280), 2017-05-29
Supplement: bmjopen-2016-015280.draft_revisions.pdf [file bmjopen-2016-015280.draft_revisions.pdf]

# BMJ Open

## Epidural analgesia in critically ill patients with acute pancreatitis: the multicentre randomised controlled EPIPAN study protocol

|                               |                                                                                                                                                                                                                                                                                                                                                                                                                                                                                                                                                                                                                                                                                                                                                                                                                                                                                                                                                                                                                                                                                                                                                                                                                                                                                                                                                                                                                                                                                                                                                                                                                                                                                                                                                                                                                                                                                                                                                                                                                                                                                                                                                                                                                                                                                                                                                                                                                                                                                                                                                                                                                        |
|-------------------------------|------------------------------------------------------------------------------------------------------------------------------------------------------------------------------------------------------------------------------------------------------------------------------------------------------------------------------------------------------------------------------------------------------------------------------------------------------------------------------------------------------------------------------------------------------------------------------------------------------------------------------------------------------------------------------------------------------------------------------------------------------------------------------------------------------------------------------------------------------------------------------------------------------------------------------------------------------------------------------------------------------------------------------------------------------------------------------------------------------------------------------------------------------------------------------------------------------------------------------------------------------------------------------------------------------------------------------------------------------------------------------------------------------------------------------------------------------------------------------------------------------------------------------------------------------------------------------------------------------------------------------------------------------------------------------------------------------------------------------------------------------------------------------------------------------------------------------------------------------------------------------------------------------------------------------------------------------------------------------------------------------------------------------------------------------------------------------------------------------------------------------------------------------------------------------------------------------------------------------------------------------------------------------------------------------------------------------------------------------------------------------------------------------------------------------------------------------------------------------------------------------------------------------------------------------------------------------------------------------------------------|
| Journal:                      | <i>BMJ Open</i>                                                                                                                                                                                                                                                                                                                                                                                                                                                                                                                                                                                                                                                                                                                                                                                                                                                                                                                                                                                                                                                                                                                                                                                                                                                                                                                                                                                                                                                                                                                                                                                                                                                                                                                                                                                                                                                                                                                                                                                                                                                                                                                                                                                                                                                                                                                                                                                                                                                                                                                                                                                                        |
| Manuscript ID                 | bmjopen-2016-015280                                                                                                                                                                                                                                                                                                                                                                                                                                                                                                                                                                                                                                                                                                                                                                                                                                                                                                                                                                                                                                                                                                                                                                                                                                                                                                                                                                                                                                                                                                                                                                                                                                                                                                                                                                                                                                                                                                                                                                                                                                                                                                                                                                                                                                                                                                                                                                                                                                                                                                                                                                                                    |
| Article Type:                 | Protocol                                                                                                                                                                                                                                                                                                                                                                                                                                                                                                                                                                                                                                                                                                                                                                                                                                                                                                                                                                                                                                                                                                                                                                                                                                                                                                                                                                                                                                                                                                                                                                                                                                                                                                                                                                                                                                                                                                                                                                                                                                                                                                                                                                                                                                                                                                                                                                                                                                                                                                                                                                                                               |
| Date Submitted by the Author: | 24-Nov-2016                                                                                                                                                                                                                                                                                                                                                                                                                                                                                                                                                                                                                                                                                                                                                                                                                                                                                                                                                                                                                                                                                                                                                                                                                                                                                                                                                                                                                                                                                                                                                                                                                                                                                                                                                                                                                                                                                                                                                                                                                                                                                                                                                                                                                                                                                                                                                                                                                                                                                                                                                                                                            |
| Complete List of Authors:     | <p>Bulyez, Stéphanie; Centre Hospitalier Universitaire de Clermont-Ferrand, Department of Perioperative Medicine</p> <p>Pereira, Bruno; Centre Hospitalier Universitaire de Clermont-Ferrand, Department of Clinical Research and Innovation (DRCI)</p> <p>Caumon, Elodie; Centre Hospitalier Universitaire de Clermont-Ferrand, Department of Clinical Research and Innovation (DRCI)</p> <p>Imhoff, Etienne; Centre Hospitalier Universitaire de Clermont-Ferrand, Department of Perioperative Medicine</p> <p>Roszyk, Laurence; Centre Hospitalier Universitaire de Clermont-Ferrand, Department of Medical Biochemistry and Molecular Biology; Université d'Auvergne Faculte de Medecine, EA7281, R2D2, GReD</p> <p>Bernard, Lise; Centre Hospitalier Universitaire de Clermont-Ferrand, Pôle Pharmacie; Clermont Université, Université d'Auvergne, EA 4676, C-Biosenss</p> <p>Bühler, Leo; Hopitaux Universitaires de Geneve, Department of Surgery</p> <p>Heidegger, Claudia; Hopitaux Universitaires de Geneve, Division of Intensive Care</p> <p>Jaber, S.; Centre Hospitalier Regional Universitaire de Montpellier, Department of Anesthesiology and Critical Care Medicine B (DAR B), Saint-Eloi teaching hospital; Université de Montpellier, INSERM U-1046</p> <p>LEFRANT, Jean Yves; Centre Hospitalier Universitaire de Nimes, Division of Anesthesiology, Critical Care, Pain and Emergency Medicine; Université de Montpellier Faculte de Medecine - Site de Nimes, EA 2992</p> <p>Chabanne, Russell; Centre Hospitalier Universitaire de Clermont-Ferrand, Department of Perioperative Medicine</p> <p>Bertrand, Pierre-Marie; Centre Hospitalier de Cannes, Intensive Care Unit</p> <p>Laterre, Pierre-François; Cliniques Universitaires Saint-Luc, Department of Critical Care Medicine</p> <p>Guerci, Philippe; Centre Hospitalier Universitaire de Nancy, Department of Anesthesiology and Intensive Care Medicine</p> <p>Danin, Pierre-Eric; Centre Hospitalier Universitaire de Nice, Anesthesia and Surgical Intensive Care, Nice Archet 2; Université de Nice Faculte de Medecine, INSERM U1065, team 8</p> <p>Escudier, Etienne; Centre Hospitalier Annecy Genevois, Intensive Care Unit</p> <p>Sossou, Achille; Centre Hospitalier Emile Roux, Department of Anesthesiology and Critical Care Medicine</p> <p>Morand, Dominique; Centre Hospitalier Universitaire de Clermont-Ferrand, Department of Clinical Research and Innovation (DRCI)</p> <p>Sapin, Vincent; CHU Clermont-Ferrand, Department of Medical Biochemistry and Molecular Biology; Université d'Auvergne Faculte de</p> |

|                                 |                                                                                                                                                                                                                                                                                                                                                                                                     |
|---------------------------------|-----------------------------------------------------------------------------------------------------------------------------------------------------------------------------------------------------------------------------------------------------------------------------------------------------------------------------------------------------------------------------------------------------|
|                                 | Medecine, EA7281, R2D2, GReD<br>Constantin, Jean-Michel; Centre Hospitalier Universitaire de Clermont-Ferrand, Department of Perioperative Medicine; Universite d'Auvergne Faculte de Medecine, EA7281, R2D2, GReD<br>Jabaudon, Matthieu; Centre Hospitalier Universitaire de Clermont-Ferrand, Department of Perioperative Medicine; Universite d'Auvergne Faculte de Medecine, EA7281, R2D2, GReD |
| <b>Primary Subject Heading</b>: | Intensive care                                                                                                                                                                                                                                                                                                                                                                                      |
| Secondary Subject Heading:      | Anaesthesia, Gastroenterology and hepatology                                                                                                                                                                                                                                                                                                                                                        |
| Keywords:                       | Acute pancreatitis, Epidural analgesia, Randomised controlled trial, Intensive care unit                                                                                                                                                                                                                                                                                                            |
|                                 |                                                                                                                                                                                                                                                                                                                                                                                                     |

SCHOLARONE™  
Manuscripts

1  
2  
3 **Epidural analgesia in critically ill patients with acute pancreatitis:**  
4  
5 **the multicentre randomised controlled EPIPAN study protocol**  
6  
7

8  
9 Stéphanie Bulyez<sup>1</sup>, Bruno Pereira<sup>2</sup>, Elodie Caumon<sup>2</sup>, Etienne Imhoff<sup>1</sup>, Laurence Roszyk<sup>3,4</sup>,  
10 Lise Bernard<sup>5,6</sup>, Leo Bühler<sup>7</sup>, Claudia Heidegger<sup>8</sup>, Samir Jaber<sup>9</sup>, Jean-Yves Lefrant<sup>10</sup>, Russell  
11 Chabanne<sup>1</sup>, Pierre-Marie Bertrand<sup>11</sup>, Pierre-François Laterre<sup>12</sup>, Philippe Guerci<sup>13</sup>, Pierre-Eric  
12 Danin<sup>14</sup>, Etienne Escudier<sup>15</sup>, Achille Sossou<sup>16</sup>, Dominique Morand<sup>2</sup>, Vincent Sapin<sup>3,4</sup>, Jean-  
13 Michel Constantin<sup>1,4</sup>, Matthieu Jabaudon<sup>1,4</sup> for the EPIPAN study group and the AzuRea  
14 network  
15  
16  
17  
18  
19  
20  
21  
22  
23  
24

25 <sup>1</sup>Department of Perioperative Medicine, CHU Clermont-Ferrand, Clermont-Ferrand, France

26 <sup>2</sup>Department of Clinical Research and Innovation (DRCI), CHU Clermont-Ferrand,  
27 Clermont-Ferrand, France  
28  
29

30 <sup>3</sup>Department of Medical Biochemistry and Molecular Biology, CHU Clermont-Ferrand,  
31 Clermont-Ferrand, France  
32  
33

34 <sup>4</sup>Clermont Université, Université d'Auvergne, EA 7281, R2D2, Clermont-Ferrand, France  
35

36 <sup>5</sup>Department of Pharmacy, CHU Clermont-Ferrand, Clermont-Ferrand, France  
37

38 <sup>6</sup>Clermont Université, Université d'Auvergne, EA 4676C-BIOSENS, Clermont-Ferrand,  
39 France  
40  
41  
42

43 <sup>7</sup>Department of Surgery, Geneva university hospitals, Geneva, Switzerland  
44

45 <sup>8</sup>Division of Intensive Care, Geneva university hospitals, Geneva, Switzerland  
46

47 <sup>9</sup>Department of Anesthesiology and Critical Care Medicine B (DAR B), Saint-Eloi teaching  
48 hospital, Montpellier university hospital, INSERM U-1046, Montpellier, France  
49  
50

51 <sup>10</sup>Division of Anesthesiology, Critical Care, Pain and Emergency Medicine, Nîmes university  
52 hospital and EA 2992, Université Montpellier, Nîmes, France  
53  
54  
55  
56  
57  
58  
59  
60

1  
2  
3 <sup>11</sup>Intensive Care Unit, Cannes general hospital, Cannes, France  
4

5 <sup>12</sup>Department of Critical Care Medicine, Saint Luc university hospital, Université Catholique  
6  
7 de Louvain, Brussels, Belgium  
8

9 <sup>13</sup>Department of Anesthesiology and Intensive Care Medicine, Nancy university hospital,  
10  
11 Nancy, France  
12

13 <sup>14</sup>Anesthesia and Surgical Intensive Care, Nice Archet 2 university hospital and INSERM  
14  
15 U1065, team 8, Nice, France  
16

17 <sup>15</sup>Intensive Care Unit, Annecy Genevois general hospital, Annecy, France  
18

19 <sup>16</sup>Department of Anesthesiology and Critical Care Medicine, Emile-Roux general hospital, Le  
20  
21 Puy-en-Velay, France  
22  
23  
24  
25  
26  
27  
28  
29  
30

31 Corresponding author and address for reprints:  
32

33 Matthieu Jabaudon, M.D., Ph.D.  
34

35 Department of Perioperative Medicine, University Hospital of Clermont-Ferrand  
36  
37 Clermont Université, Université d'Auvergne, EA 7281, R2D2, Clermont-Ferrand, France  
38  
39 CHU Clermont-Ferrand, 1 Place Lucie Aubrac, 63003 Clermont-Ferrand Cedex 1, France  
40  
41

42 (Tel) +33 473 750 501 (Fax) +33 473 750 500  
43

44 (Mail) [mjabaudon@chu-clermontferrand.fr](mailto:mjabaudon@chu-clermontferrand.fr)  
45  
46  
47  
48  
49  
50

51 Word count: 4871  
52  
53  
54  
55  
56  
57  
58  
59  
60

## ABSTRACT

**Introduction:** Acute pancreatitis (AP) is a common gastrointestinal disease that is associated with high morbidity and mortality in its most severe forms. Most patients with severe AP require intubation and invasive mechanical ventilation, frequently for more than 7 days, which is associated with worst outcome. Recent increasing evidence from preclinical and clinical studies support beneficial effects of epidural analgesia (EA) in AP, such as increased gut barrier function and splanchnic, pancreatic, renal perfusion, decreased liver damage and inflammatory response, and reduced mortality. Because recent studies suggest that EA might be a safe procedure in the critically ill, we sought to determine whether EA reduced AP-associated respiratory failure and other major clinical outcomes in patients with AP.

**Methods and analysis:** The Epidural Analgesia for Pancreatitis (EPIPAN) trial is an investigator-initiated prospective multicentre randomised controlled two-arm trial with assessor-blinded outcome assessment. The EPIPAN trial randomises 148 patients with AP requiring admission to an intensive care unit (ICU) to receive EA (with patient-controlled epidural administration of ropivacaine and sufentanil) combined with standard care based on current recommendations on the treatment of AP (interventional group), or standard care alone (reference group). The primary outcome is the number of ventilator-free days at day 30. Secondary outcomes include main complications of AP (e.g., organ failure and mortality, among others), levels of biological markers of systemic inflammation, epithelial lung injury, renal failure, and healthcare-associated costs.

**Ethics and dissemination:** The study project has been approved by the appropriate ethics committee (*CPP Sud-Est VI*). Informed consent is required. If combined application of EA and standard care proves superior to standard care alone in patients with AP in the ICU, the use of EA may become standard practice in experienced centres, thereby decreasing potential complications related to AP and its burden in critically ill patients.

1  
2  
3 **Trial registration number:** NCT02126332.  
4  
5  
6

7 (Abstract word count: 295)  
8  
9

10  
11  
12  
13  
14 **STRENGTHS AND LIMITATIONS OF THIS STUDY**  
15

- 16  
17  
18 • This is the first randomised controlled trial to investigate the effects of epidural analgesia  
19 on organ failure, mortality and clinical outcomes in critically ill patients with acute  
20 pancreatitis enrolled in a total of 11 French, Belgian and Swiss intensive care units.  
21  
22  
23  
24 • Although previous studies have reported good feasibility and safety of epidural analgesia  
25 in the intensive care unit setting, this trial will provide valuable data on its safety in  
26 critically ill patients.  
27  
28  
29  
30  
31 • In addition, our study includes the constitution of a biobank of plasma and urine sampled  
32 over the first week after inclusion, in order to assess the effects of EA on biological  
33 markers of inflammation, lung injury and renal failure.  
34  
35  
36  
37  
38 • One limitation of the study is that the physicians are aware of the group of inclusion.  
39 However, assessors of study outcomes and biological measures are independent observers  
40 who do not know the group of inclusion.  
41  
42  
43  
44 • Another limitation may include poor generalisability of results from this study to  
45 unexperienced centres, because EA is a technique that is restricted to experienced  
46 anaesthesiologists and intensivists.  
47  
48  
49  
50  
51  
52  
53  
54  
55  
56  
57  
58  
59  
60

## INTRODUCTION

### Background and rationale

This manuscript was written in accordance with the SPIRIT guidelines (supporting file in the appendix).[1]

Acute pancreatitis (AP) is one of the most frequent gastrointestinal diseases, whose incidence in the US reaches 35 per 100,000 population annually. In 2009, AP was responsible for 275,000 hospital admissions in the USA, with a total cost of over US \$2,5 billion.[2,3]. AP develops when intracellular protective mechanisms to prevent trypsinogen activation or reduce trypsin activity are overwhelmed[4]. The initiating event may be any insult to the acinar cell that impairs the secretion of zymogen granules, such as alcohol abuse or gallstone migration into the common bile duct. Once the process of cellular injury is initiated, cellular membrane trafficking becomes chaotic, leading to the release of proinflammatory mediators (tumour necrosis factor (TNF)- $\alpha$ , interleukin (IL)-6, and IL-8). These mediators participate to an increase in pancreatic vascular permeability that subsequently favours hemorrhage, oedema and eventually pancreatic necrosis. As these mediators are excreted into the circulation, systemic complications can arise, such as bacteraemia due to gut flora translocation, acute respiratory distress syndrome (ARDS)[5], pleural effusions, gastrointestinal hemorrhage and renal failure.[4,6–9]

The revised Atlanta classification addresses the clinical course and severity of the disease.[10] AP may be divided into two forms, interstitial oedematous pancreatitis, during the first week, and necrotising pancreatitis during a later phase (after 7 days). In approximately 80% of patients, the severity of AP is rather mild and resolves without serious morbidity. However, in up to 20% of patients, AP presents in a more severe form requiring admission to the intensive care unit (ICU) due to persistent organ failure.[10,11] Mortality

1  
2  
3 rate can reach 20-40% in severe AP because of multiorgan failure (MOF) and pancreatic  
4  
5 necrosis.[2,12]  
6

7  
8 The amplifying effects of inflammatory and oxidative impairment often lead to severe  
9  
10 AP-induced complications, which are often regarded as hallmarks of severe AP and herald  
11  
12 poor outcome. In a recent French observational study of ICU patients with severe AP, 58% of  
13  
14 patients developed acute respiratory failure requiring intubation and invasive mechanical  
15  
16 ventilation (MV) (mean duration 15 days, standard deviation (SD) 17 days), and such patients  
17  
18 had higher mortality rates than those who were not intubated (34% vs 1.4%).[12] Since  
19  
20 respiratory failure is the main cause of death in patients with severe AP, more work is needed  
21  
22 for us to prevent and treat AP-associated respiratory failure. Despite recent substantial  
23  
24 improvements in the multidisciplinary management of AP (e.g., with regards to fluid therapy,  
25  
26 intensive care management, prevention of infectious complications, nutritional support,  
27  
28 biliary tract management or necrotising pancreatitis management), the prognosis of severe AP  
29  
30 remains poor in patients who develop acute respiratory failure requiring intubation and  
31  
32 invasive respiratory support.[4,10,13] Of notes, available therapeutic approaches do not have  
33  
34 a direct action on the pancreas itself but aim to attenuate the process of MOF present in the  
35  
36 severe form of AP, and no causal treatment has been developed yet.  
37  
38  
39

40  
41 Epidural analgesia (EA) is one of the most widely and versatile utilized neural  
42  
43 deafferentation technique. It is used for analgesia during the perioperative period, but also for  
44  
45 obstetrics labour and trauma as well as in the treatment of acute, chronic and cancer-related  
46  
47 pain.[14,15] Its objective is not only to block noxious afferent stimuli, but also to induce  
48  
49 bilateral selective thoracic sympathetic blockade. In addition to analgesia itself, modulatory  
50  
51 effects of thoracic EA could improve organ perfusion with reduced complications in the  
52  
53 perioperative period, thus possibly decreasing postoperative complications, shortening  
54  
55 hospital stay and improving survival.[15–17]  
56  
57  
58  
59  
60



1  
2  
3 EA has not yet been extensively assessed in the ICU setting in general, and in  
4 critically ill patients with severe AP in particular. Several studies suggest that thoracic EA  
5 might be a safe procedure in centres comprising anaesthesiologists with expertise in EA, and  
6 thoracic EA has already been used for years to treat pain during AP in critically ill patients in  
7 some centres.[18–20] In addition, recent animal studies suggest that thoracic EA may  
8 decrease the severity of AP, with reduced respiratory, thromboembolic and abdominal  
9 complications.[21–23] EA further decreased the severity of metabolic acidosis and tissue  
10 injury in animals, thus preventing the progression from oedematous to necrotising AP.[24]  
11 EA may also restore pancreatic hypoperfusion induced by AP through blood flow  
12 redistribution from splanchnic to non-perfused pancreatic regions,[25,26] and a recent  
13 clinical study suggests that EA could increase pancreatic arterial perfusion and improve  
14 clinical outcome in patients with AP.[20] Findings from other experimental studies also  
15 support beneficial effects of EA in severe AP, such as increased gut barrier function and renal  
16 perfusion, decreased liver damage and inflammatory response, and reduced  
17 mortality.[23,25,27,28]

18  
19  
20  
21  
22  
23  
24  
25  
26  
27  
28  
29  
30  
31  
32  
33  
34  
35  
36  
37  
38  
39  
40  
41  
42  
43  
44  
45  
46  
47  
48  
49  
50  
51  
52  
53  
54  
55  
56  
57  
58  
59  
60

Despite such promising findings from preclinical studies, the effects of thoracic EA on major clinical outcomes have never been specifically assessed and its benefit in critically ill patients with AP remains uncertain.

## **Objectives**

### ***Primary objective***

To determine whether the use of thoracic EA combined to standard care is more effective at increasing ventilator-free days (VFD) at day 30 over standard care alone in critically ill patients with AP. The goal of the EIPAN trial is therefore to test the impact of

1  
2  
3 thoracic EA on respiratory failure, with the hypothesis that EA could influence survival  
4  
5 and/or the need for invasive MV and/or its duration when invasive MV is required.  
6  
7

### 8 9 ***Secondary objectives***

10  
11 To determine whether in comparison to standard care alone, application of thoracic  
12  
13 EA combined with standard care could improve survival, decrease major complications of  
14  
15 AP (including sepsis, organ failure), AP-related costs, the need for medical, surgical and  
16  
17 radiological interventions, and impact biological markers of systemic inflammation, lung  
18  
19 injury and renal failure.  
20  
21

### 22 23 24 25 **Trial design**

26  
27 The Epidural Analgesia for Pancreatitis (EPIPAN) trial is an investigator-initiated,  
28  
29 open-labelled, multicentre randomised controlled two-arm trial.  
30  
31

### 32 33 34 **CONSORT diagram**

35  
36 Figure 1 shows the CONSORT diagram of the EPIPAN trial.  
37  
38  
39  
40  
41

## 42 **METHODS: PARTICIPANTS, INTERVENTIONS AND OUTCOMES**

### 43 44 45 46 **Study setting**

47  
48 The EPIPAN study is undergoing in a total of 11 mixed medical and surgical ICUs in  
49  
50 France (Clermont-Ferrand (2 ICUs), Montpellier, Nîmes, Cannes, Nancy, Nice, Annecy, Le-  
51  
52 Puy-en-Velay), Belgium (Brussels) and Switzerland (Geneva).  
53  
54

### 55 56 57 **Eligibility criteria**

### ***Inclusion criteria***

Patients must be admitted to the ICU for AP, whatever the precise reason for admission (e.g., pain management, organ failure).

### ***Exclusion criteria***

Patients fulfilling one or more of the following criteria are not included: age <18 years, pregnant or breastfeeding woman, protected person, known or suspected hypersensitivity to study drugs (ropivacaine and sufentanil are administered via the epidural catheter in the EA group, and epidural clonidine can be used as an iterative rescue treatment to achieve analgesia goals), and absolute contraindications to the placement of an epidural catheter: prothrombin time < 60 %, platelet count < 75 G/L<sup>-1</sup>, curative anticoagulation unless it can be interrupted for at least 8 hours, local infection, active infection of the central nervous system, suspected or confirmed intracranial hypertension, history of back surgery including a dural space procedure, refractory circulatory shock despite adequate resuscitation.

### **Interventions**

Patients eligible for inclusion will be randomly assigned to the interventional group (EA combined with standard care) or to the reference group (standard care alone). Because the trial was primarily designed as a pragmatic trial, all patients will be managed by attending physicians as recommended in recent consensual guidelines on the management of severe AP (standard care): early enteral nutrition when possible, resuscitation measures to correct hypovolemia, maintenance of electrolyte balance, correction of acidosis, early diagnosis and supportive treatment of complications [10,13,29–31] Analgesia goals are the same in both groups, with regular evaluation of pain, at least every 4 hours. In conscious and communicating patients, a visual analogue score (VAS) for pain below 40/100 is targeted and

1  
2  
3 a behavioural pain scale (BPS) of 3-4 is targeted in non-communicating patients.[32,33] In  
4  
5 both groups, a stepped multimodal approach to pain management will be applied based on  
6  
7 routine protocols from each participating centre, and combining opioid, non-opioid +/-  
8  
9 adjuvant drugs administered through the oral, enteral and/or intravenous routes, as  
10  
11 recommended by the World Health Organization's pain relief ladder.[13,34]  
12  
13

14 The interventional group consists in applying standard care combined with thoracic  
15  
16 EA through an epidural catheter placed in an intervertebral space between the 6<sup>th</sup> and the 9<sup>th</sup>  
17  
18 thoracic vertebra, and administration of a mixed solution of ropivacaine (2 mg.mL<sup>-1</sup>) and  
19  
20 sufentanil (0.5 µg.mL<sup>-1</sup>), for at least 72 hours. EA will be provided using a patient-controlled  
21  
22 epidural analgesia (PCEA) device, with continuous infusion rate of 5 to 15 mL.h<sup>-1</sup> and *bolus*  
23  
24 of 3 to 10 mL every 10 minutes maximum. If the patient is not able to self-administer EA,  
25  
26 nurses are encouraged to administer *bolus* to achieve analgesia goals if necessary. In addition,  
27  
28 iterative epidural administrations of clonidine (1 µg.kg<sup>-1</sup>) may be used by attending  
29  
30 physicians to achieve analgesia goals.[35] The drugs used during EA in this trial will be  
31  
32 provided in an unblinded manner by the department of Pharmacy at Clermont-Ferrand  
33  
34 university hospital to all participating centres.  
35  
36  
37

38 Because of insufficient evidence regarding the optimal duration of EA in ICU  
39  
40 patients,[18,19,36] total duration of EA will be chosen by participating physicians for each  
41  
42 patient, given that it has been administered for at least 72 hours. Weaning of EA and removal  
43  
44 of epidural catheter will be conducted accordingly to recommendations and routine protocols  
45  
46 from each participating centre.  
47  
48  
49

## 50 51 **Outcomes**

### 52 ***Primary outcome measures***

53  
54  
55  
56  
57  
58  
59  
60

1  
2  
3 The primary outcome variable is the number of VFD at day 30, defined as the number  
4 of days from day 0 (inclusion) to day 30 after inclusion on which a patient is able to breathe  
5 without invasive assistance. A difference in VFD can reflect a difference in mortality,  
6 ventilator days, or both.  
7  
8  
9  
10

### 11 12 13 *Secondary outcome measures*

14  
15  
16 Secondary outcomes are the need for and duration of invasive and/or noninvasive MV  
17 at day 30, the incidence of AP-related complications at day 30 (death, organ failure, severe  
18 sepsis, septic shock,[37] ARDS,[5] acute respiratory failure, abdominal compartment  
19 syndrome, intra- or extra-abdominal sepsis, pancreatic necrosis or abscess (infected or not),  
20 hemodynamic failure requiring vasopressor therapy, acute kidney injury,[38] requirement for  
21 renal replacement therapy, infected intra-abdominal abscesses requiring drainage  
22 (radiological, endoscopic or surgical), intolerance to enteral feeding), analgesia scores (VAS,  
23 BPS), need for sedation (drugs, doses, level of sedation using the Richmond Agitation-  
24 Sedation Scale)[39,40], lengths of stay in ICU and in hospital, the need for ICU readmission  
25 within 30 days after inclusion, levels on days 0, 2 and 7 after inclusion of biological markers  
26 (as assessed in *duplicate* using commercially available kits) of systemic inflammation  
27 (plasma levels of IL-6)[41], lung epithelial injury (plasma levels of the soluble form of the  
28 receptor for advanced glycation end-products, sRAGE)[42,43] and acute kidney injury  
29 (plasma levels of neutrophil gelatinase-associated lipocalin, NGAL,[44,45], urine levels of  
30 tissue inhibitor of metalloproteinase 2 (TIMP-2) and insulin-like growth factor binding  
31 protein7 (IGFBP-7)[46]), and healthcare-related costs at day 30.  
32  
33  
34  
35  
36  
37  
38  
39  
40  
41  
42  
43  
44  
45  
46  
47  
48  
49  
50

51 The need for antibiotic or antifungal therapy will be assessed. Any minor or major  
52 complication that could be attributable to EA and/or epidural catheter will also be rigorously  
53  
54  
55  
56  
57  
58  
59  
60

1  
2  
3 documented.  
4  
5  
6

### 7 **Participant timeline**

8  
9 The participant timeline is described in table 1.  
10  
11

### 12 **Recruitment**

13  
14  
15 Patients are expected to be included during a 3-year inclusion period that has begun in  
16  
17 June 2014.  
18  
19

20 2013-2014: Protocol, approvals from the ethics committee (*CPP Sud-Est VI*) and the French  
21  
22 Medicine agency (*Agence Nationale de Sécurité du Médicament, ANSM*); trial tool  
23  
24 development (case report form, randomisation system).  
25  
26

27 2014-2017: Inclusion of patients.  
28

29 2017: Cleaning and closure of the database. Data analyses, writing of the manuscript and  
30  
31 submission for publication.  
32

33 A prolongation of the inclusion period will be requested if needed based on observed  
34  
35 inclusion rate.  
36  
37  
38  
39  
40  
41

## 42 **METHODS: ASSIGNMENT OF INTERVENTIONS**

### 43 **Allocation and sequence generation**

44  
45  
46 An electronic, centralised web-based data management system will be used for  
47  
48 randomisation (TENALEA, FormsVision BV, the Netherlands). To minimise selection bias,  
49  
50 randomisation will be performed in strict sequence, that is, when a subject is confirmed as  
51  
52 eligible for randomisation, the next unassigned randomisation number in sequence will be  
53  
54 given. Randomisation will be stratified and minimised based on the recruiting centre, the  
55  
56  
57  
58  
59  
60

1  
2  
3 duration of symptoms (either above or below 48 hours from first symptoms, e.g. abdominal  
4 pain, to inclusion) and severity of AP as assessed by the modified Marshall scoring system  
5 for organ dysfunction.[10,47] This scoring system has the merit of simplicity, universal  
6 applicability across international centres, and the ability to stratify disease severity easily and  
7 objectively based on respiratory, renal and/or hemodynamic failure.[48] A score of 2 or more  
8 usually defines the presence of organ failure, and 3 strata of severity (scores equal to 0, 1-2 or  
9 3-4) are used to stratify randomisation on the degree of organ failure in the EPIPAN trial.  
10  
11  
12  
13  
14  
15  
16  
17  
18  
19

### 20 **Blinding**

21  
22 This is an open-label, unblinded trial for patients and physicians in charge of the  
23 patients, because of the nature itself of the intervention (placement and maintenance of EA  
24 through an epidural catheter). Although some systems may be proposed to ensure, at least,  
25 partial blinding to the patient when EA is assessed,[49] such systems were not included in the  
26 trial design in order to ensure better feasibility among multiple centres. However, assessors of  
27 clinical and biological data in charge of statistical analyses and outcome assessment will be  
28 masked as to the subjects' assigned group.  
29  
30  
31  
32  
33  
34  
35  
36  
37  
38  
39  
40  
41

## 42 **METHODS: DATA COLLECTION, MANAGEMENT AND ANALYSIS**

### 43 **Data collection and management**

44  
45  
46  
47 Study data are prospectively collected and managed by trained research coordinators  
48 and/or investigators from each participating centre, using REDCap electronic data capture  
49 tools hosted at Clermont-Ferrand university hospital.[50] REDCap (Research Electronic Data  
50 Capture) is a secure, web-based application designed to support data capture for research  
51 studies, providing: 1) an intuitive interface for validated data entry; 2) audit trails for tracking  
52  
53  
54  
55  
56  
57  
58  
59  
60

1  
2  
3 data manipulation and export procedures; 3) automated export procedures for seamless data  
4  
5 downloads to common statistical packages; and 4) procedures for importing data from  
6  
7 external sources.  
8

9  
10 The following data are collected and registered at ICU admission and upon inclusion:  
11  
12 baseline demographics and characteristics (age, sex, weight, height, body temperature, delay  
13  
14 between the onset of AP and ICU admission/study inclusion, comorbidities and coexisting  
15  
16 conditions), baseline severity of illness (modified Marshall scoring system, Simplified Acute  
17  
18 Physiologic Score (SAPS) II, Sequential Organ Failure Assessment (SOFA)), usual clinical  
19  
20 and biological variables that are measured in critically ill patients, organ failure and  
21  
22 treatments. From inclusion to day 30 will be assessed: survival status, main complications of  
23  
24 AP (e.g., organ failure, sepsis), the need for therapeutic interventions (such as surgery or  
25  
26 endoscopic manoeuvres, MV (either invasive or noninvasive), vasopressor support,  
27  
28 continuous renal replacement therapy and/or antibiotic therapy), duration of MV if required,  
29  
30 length of stay in the ICU/hospital. Biological samples will be collected in each participating  
31  
32 centre, prior to shipment of all samples to the department of Medical Biochemistry and  
33  
34 Molecular Biology at Clermont-Ferrand university hospital for blinded measurements.  
35  
36  
37  
38  
39

## 40 **Statistical methods**

### 41 ***Sample size Estimation***

42  
43  
44  
45 According to previous studies from the literature,[12,20] we have estimated that a  
46  
47 sample size of  $n = 74$  patients per group would provide 80% statistical power to detect an  
48  
49 absolute between-group difference of 7 days (with a SD of  $\pm 15$ ) in the primary outcome, i.e.  
50  
51 in the number of VFD at day 30 after randomization (expected number of VFD at day 30:  $20$   
52  
53  $\pm 15$  vs.  $13 \pm 15$ ), for a two-sided type I error of 5%.  
54  
55  
56  
57  
58  
59  
60



1  
2  
3 Given theoretical concerns related to possible adverse effects of EA in ICU patients,  
4  
5 an interim safety analysis will be performed after data for 74 patients are collected. The  
6  
7 independent Data and Safety Monitoring Board (DSMB) will recommend that the trial be  
8  
9 stopped if it is found that the conduct of the trial compromises patient safety (a between-  
10  
11 group difference in mortality or VFD at day 30).  
12  
13

### 14 15 16 *Statistical analysis*

17  
18 A predefined statistical analysis plan will be followed. Statistical analyses will be  
19  
20 conducted using Stata software (version 14, StataCorp, College Station, USA). A two-sided  
21  
22 p-value of less than 0.05 will be considered to indicate statistical significance.  
23  
24

25 Concerning the primary outcome, the comparison between interventional and  
26  
27 reference groups will be analysed using Student's t-test or Mann-Whitney's test if  
28  
29 assumptions of t-test are not met. Normality will be studied by the Shapiro-Wilk test and  
30  
31 homoscedasticity using the Fisher-Snedecor test. Results will be expressed as effect-sizes and  
32  
33 95% confidence intervals. Intention to treat (ITT) analysis of data from all randomised  
34  
35 patients (except patients who withdraw their consent and those who do not meet the inclusion  
36  
37 criteria), including those from the interventional group who do not receive EA for at least 72  
38  
39 hours, will be considered for the primary analysis. Then, the analysis of the primary outcome  
40  
41 will be completed by multivariate analysis using a linear mixed model to take into account:  
42  
43 (1) fixed effects covariates determined according to univariate results and to clinical  
44  
45 relevance (duration of symptoms (either above or below 48 hours from first symptoms, e.g.  
46  
47 abdominal pain, to inclusion) and severity of AP as assessed by the modified Marshall  
48  
49 scoring system for organ dysfunction) and (2) centre as random-effects (to measure between  
50  
51 and within centre variability). The normality of residuals will be studied as described  
52  
53 previously. Results will be expressed as regression coefficients and 95% confidence intervals.  
54  
55  
56  
57  
58  
59  
60

1  
2  
3 Other continuous endpoints (e.g., level of sedation using the Richmond Agitation-Sedation  
4 Scale, analgesia scores, doses of drugs, length of stay in ICU/hospital, levels and kinetics of  
5 biological markers, duration of MV, and healthcare-related costs at day 30) will be analysed  
6  
7  
8  
9  
10 in the same way.

11  
12 Categorical parameters (death, organ failure, severe sepsis, septic shock, ARDS, the  
13 need for MV, acute respiratory failure, abdominal compartment syndrome, intra- or extra-  
14 abdominal sepsis, pancreas necrosis (infected or not) as assessed by computed tomography,  
15 hemodynamic failure requiring vasopressor support, acute kidney injury, the need for renal  
16 replacement therapy, intra-abdominal collection requiring radiological, surgical or  
17 endoscopic drainage) will be analysed using Chi-squared or Fisher's exact tests for univariate  
18 analysis and generalized linear mixed model (logistic for dichotomous dependent endpoint or  
19 Poisson if more appropriate) for multivariate analysis. Type I error will be adjusted using the  
20 Hochberg method if appropriate. Results will be expressed as relative risks and 95%  
21 confidence intervals. These data will also be analysed as censored data, when appropriate;  
22 survival analyses will be performed with the Kaplan-Meier estimator and differences between  
23 groups will then be assessed using the log-rank test. The assumption of log-linearity of risk  
24 and the proportional hazards will be checked beforehand. Results will be expressed as hazard  
25 ratios and 95% confidence intervals. The tolerance of enteral nutrition and/or the incidence of  
26 signs of gastrointestinal intolerance (nausea, vomiting, and ileus) will be analysed similarly.  
27  
28  
29  
30  
31  
32  
33  
34  
35  
36  
37  
38  
39  
40  
41  
42  
43  
44

45  
46 Longitudinal analyses of repeated measures (levels on days 0, 2 and 7 after inclusion  
47 of biological markers of systemic inflammation, lung epithelial injury and acute kidney injury  
48 will be studied using random-effect models (linear or generalized linear), to take into account  
49 patients as random-effect (slope and intercept), nested in centre random-effect.  
50  
51  
52  
53  
54  
55  
56  
57  
58  
59  
60

1  
2  
3 According to clinical relevance and to CONSORT recommendations, subgroup  
4 analyses depending on the presence or the absence of epidural analgesia will be proposed  
5 after the study of subgroup x randomisation group interaction in regression models.  
6  
7

8  
9  
10 Per-protocol analyses will also be conducted after intention-to-treat analysis is  
11 performed. Results from per-protocol analyses will be compared to those from intention-to-  
12 treat analyses. A particular focus will be given to safety and patients who are lost to follow-  
13 up. A sensitivity analysis will be performed and the nature of missing data will be studied  
14 (missing at random or not). According to this study, the most appropriate approach to the  
15 imputation of missing data will be proposed (maximum bias (e.g., last observation carried  
16 forward vs. baseline observation carried forward) or estimation proposed by Verbeke and  
17 Molenberghs for repeated data).  
18  
19  
20  
21  
22  
23  
24  
25  
26  
27  
28  
29  
30

## 31 **METHODS: MONITORING**

### 32 **Data monitoring**

33  
34  
35  
36  
37  
38 Before the start of patient recruitment, all physicians and other healthcare workers in  
39 the ICU attended formal training sessions on the study protocol and data collection.  
40

41  
42 The physicians, clinical research nurses and/or clinical research assistants are in  
43 charge of daily patient screening and inclusion, ensuring compliance with the study protocol  
44 and collecting the study data. Patients who are admitted to the ICU with AP but who are not  
45 included, and the reasons why they are not included, will be recorded anonymously into a  
46 screening log in each centre.  
47  
48  
49  
50  
51  
52

53  
54 Data monitoring and quality control will be conducted at least annually in all  
55 participating centres by official representatives from the study promoter, i.e. from the  
56 department of Clinical Research and Innovation at Clermont-Ferrand university hospital.  
57  
58  
59  
60

## Harms

The trial may be temporarily stopped for an individual patient, at the discretion of the attending physician, in case of major serious adverse events suspected to be associated with EA.

Given potential theoretical concerns related to possible adverse effects of EA in ICU patients, an interim safety analysis will be performed after data for 74 patients have been obtained using the Lan and DeMets method (East software, Cytel Inc., Cambridge, MA, USA). The independent Data and Safety Monitoring Board (DSMB) will recommend that the trial be stopped if it is found that the conduct of the trial compromises patient safety (a between-group difference in mortality or VFD at day 30).

All adverse events thought to be related to the trial will be reported to the trial coordinating centre. According to the French Public Health Code, all suspected unexpected serious adverse events will be reported to the ANSM. In addition, this information will be submitted to the DSMB.

## Auditing

An independent DSMB, composed of three experts (Prs. Hervé Dupont, Thomas Lescot and Philippe Montravers) will monitor the safety of the trial. The DSMB will be responsible for safeguarding the interests of trial participants, assessing the safety and efficacy of the interventions during the trial, and for monitoring the overall conduct of the clinical trial. To contribute to enhancing the integrity of the trial, the DSMB may also formulate recommendations relating to the recruitment/retention of participants, their management, improving adherence to protocol-specified regimens and retention of participants, and the procedures for data management and quality control.

## ETHICS AND DISSEMINATION

### Research ethics approval

The EPIPAN study is conducted in accordance with the declaration of Helsinki and was registered at <http://www.clinicaltrials.gov> on April 11, 2014 with trial identification number NCT02126332. The trial was approved by the ethics committee *CPP Sud-Est VI* in June, 2014 (approval number AU1090) and ANSM (approval number 131557A-32) in January, 2014. Approvals from appropriate authorities were also obtained for Belgian and Swiss centres. Any change to eligibility criteria, outcomes, analyses will be communicated to investigators, the ethics committee and the ANSM to obtain their approval.

### Consent or assent

Three methods of consent will be used, as required by the Institutional Review Board in accordance with the 2013 Declaration of Helsinki. Whenever possible, the patient will be included after written informed consent. However, the patient may be unable to provide informed consent because of the severity of illness (e.g., altered mental status, use of sedation). These patients will be included after written informed consent is provided by the next of kin, or using an emergency procedure (investigator signature, countersigned by an independent physician) if the next of kin is not present. When available, and as soon as possible after recovery, patients will be retrospectively asked for written consent to continue the trial.

### Confidentiality

1  
2  
3 Data will be handled in a confidential and anonymous manner, according to French  
4 law. All original records will be archived at trial sites for 15 years. The clean database file  
5 will be anonymised and kept for 15 years.  
6  
7  
8  
9

### 10 11 **Declaration of interest**

12  
13  
14 The study is an investigator-initiated trial. Study promotion is performed by  
15 Clermont-Ferrand university hospital, Clermont-Ferrand, France. There is no industry support  
16 or involvement in the trial.  
17  
18  
19

### 20 21 **Funding**

22  
23  
24 This trial is supported by grants from the *Société Française d'Anesthésie et de*  
25 *Réanimation (Contrat de Recherche SFAR 2015)* and from Clermont-Ferrand university  
26 hospital (*Appel d'Offre Interne 2014, CHU Clermont-Ferrand*). The funders have no  
27 influence in the study design, conduct, and analysis or in the preparation of this article.  
28  
29  
30  
31  
32  
33  
34  
35

### 36 37 **Dissemination policy**

38 Findings will be published in peer-reviewed journals and presented at local, national  
39 and international meetings and conferences to publicise and explain the research to clinicians,  
40 commissioners and service users. All investigators will have access to the final data set.  
41 Participant-level data sets will be made accessible on a controlled access basis.  
42  
43  
44  
45  
46  
47  
48  
49

## 50 51 **DISCUSSION**

52  
53  
54  
55 Severe acute pancreatitis requiring ICU admission is associated with high morbidity  
56 and mortality, especially in patients who need intubation and invasive ventilation.[10,12]  
57  
58  
59  
60

1  
2  
3 Optimising the management of critically ill patients with AP is therefore of particular  
4 importance, especially in those with, or at risk of, acute respiratory failure requiring  
5 intubation/prolonged ventilation, death, or both. However, and despite recent improvement in  
6 ICU practice in general, current guidelines on the management of severe AP only include  
7 supportive measures such as early enteral nutrition, hemodynamic resuscitation, maintenance  
8 of electrolyte balance, correction of acidosis, and early diagnosis and treatment of  
9 complications (e.g., with appropriate use of anti-infectious drugs, radiologic drainage,  
10 endoscopic manoeuvres and/or elective surgery in selected patients).[10,13,29–31]  
11  
12  
13  
14  
15  
16  
17  
18  
19

20 EA is primarily an analgesic technique that is used by anaesthesiologists to treat pain  
21 in the perioperative period, for obstetrical analgesia and after severe chest trauma.[51] There  
22 has been recent interest in the use EA as a therapy for AP, and growing evidence from  
23 experimental studies now support beneficial effects of EA that include augmented ileal  
24 mucosal capillary perfusion, restored pancreatic microcirculation, increased gut barrier  
25 function and renal perfusion, decreased severity and improved survival.[21–23,25,27,28,52].  
26  
27 However, only one small recent randomised pilot study in 35 patients with AP was found to  
28 translate such promising preclinical findings into the clinical settings.[20] In this study, the  
29 median duration of EA was 5.7 days, and no complications of the epidural procedure were  
30 reported; an improvement in perfusion of the pancreas was observed in 43% of measurements  
31 in the EA group versus 7% in the control group ( $P=0.0025$ ), but although analgesia was better  
32 when EA was used, there was no significant between-group differences in other clinical  
33 outcomes (e.g., the need for necrosectomy, length of stay in hospital and mortality), probably  
34 due to a lack of statistical power.[20] The EIPAN trial is the first randomised controlled  
35 study powered to investigate the effectiveness of thoracic EA combined with standard care on  
36 major clinical outcomes in critically ill patients with EA, with specific emphasis on  
37 respiratory outcomes and survival.[21]  
38  
39  
40  
41  
42  
43  
44  
45  
46  
47  
48  
49  
50  
51  
52  
53  
54  
55  
56  
57  
58  
59  
60

1  
2  
3 This study may have some limitations. First, no strict definition for severe AP is used  
4 to enrol patients. Instead, all patients admitted to the ICU with AP is eligible whatever the  
5 precise reason for admission (e.g., pain management, development of organ failure).  
6  
7 However, we believe that randomisation, as stratified on modified Marshall scoring system  
8 (thus distinguishing patients with absent, moderate and severe organ failure), among other  
9 parameters, should ensure similar distribution of the severity of AP in both arms. Second, we  
10 acknowledge that the EPIPAN trial does not include precise (sub)protocols addressing every  
11 single aspect of the management of patients with AP (e.g., enteral feeding, its initiation, route  
12 of administration and dose), because it was believed that it would have hamper inclusions of  
13 patient and the feasibility of this pragmatic study. Instead, current guidelines for the  
14 management of AP are actively encouraged among study participants.[10,13,29–31]  
15  
16 Although the implementation of consensual recommendations will not be specifically  
17 assessed while the study is still ongoing, and as it may impact the findings and their  
18 interpretation, adherence of physicians from participating centres to these guidelines will be  
19 analysed after study completion. Third, this trial, whatever its results, will not address the  
20 question of the selection of patients with AP who may best benefit of EA. However, analyses  
21 of clinical and biological subphenotypes of patients included in the trial, and their responses  
22 to EA, should possibly inform on how to better select patients for future studies. Fourth,  
23 another limitation may include the limited generalizability of the results obtained from this  
24 study because EA is a technique that is restricted to experienced anaesthesiologists and  
25 intensivists. Finally, some could highlight potential risks associated with EA in critically ill  
26 patients with hyperinflammatory conditions such as AP[36,53,54], although previous studies  
27 suggest good feasibility and safety of EA in this setting. Findings from the EPIPAN trial will  
28 undoubtedly provide new data on both the efficacy and the safety of EA during clinical AP.  
29  
30  
31  
32  
33  
34  
35  
36  
37  
38  
39  
40  
41  
42  
43  
44  
45  
46  
47  
48  
49  
50  
51  
52  
53  
54  
55  
56  
57  
58  
59  
60



1  
2  
3 This study also has several strengths. First, it is to our knowledge the largest  
4 randomised controlled trial in critically ill patients with AP. Even in case of “negative”  
5 results, data from this trial will contribute to a better understanding of the characteristics,  
6 management and prognosis of ICU patients with AP. Second, it is the first trial powered to  
7 specifically assess the effects of EA on major patient outcomes such as respiratory outcomes  
8 and 30-day mortality. In addition, other strengths are the inclusions performed around the  
9 clock, nights and weekend included as a routine clinical practice. Third, this study includes  
10 the constitution of a biobank of plasma and urine sampled over the first week after inclusion,  
11 in order to assess biological markers of inflammation, lung injury and renal failure and the  
12 effects of EA on such markers. Finally, and despite an open-label design, one strength of the  
13 study is that final assessors of clinical and biological data who will be in charge of statistical  
14 analyses and outcome assessment, remain masked as to the subjects' assigned group, thus  
15 limiting bias.  
16  
17  
18  
19  
20  
21  
22  
23  
24  
25  
26  
27  
28  
29  
30  
31  
32  
33

34 In conclusion, the EPIPAN trial is an investigator-initiated pragmatic multicentre  
35 randomised controlled trial powered to test the hypothesis that adding thoracic EA to  
36 standard care in comparison to standard care alone may improve respiratory outcomes, i.e.  
37 increase the number of ventilator-free days at day 30, in critically ill patients with AP. The  
38 EPIPAN trial will also assess the effects of combined EA and standard care on main  
39 complications of AP and other major patient outcomes.  
40  
41  
42  
43  
44  
45  
46  
47  
48  
49  
50  
51  
52  
53  
54  
55  
56  
57  
58  
59  
60

## AUTHORS CONTRIBUTIONS TO THE STUDY

SB is involved in the conception, hypotheses delineation, preparation and design of the study, in writing the article and in its revision prior to submission.

BP is involved in the conception, hypotheses delineation, preparation and design of the study and of statistical analyses, in writing the article and in its revision prior to submission.

EC is involved in the preparation and design of the study, in writing the article and in its revision prior to submission.

EI is involved in the conception, hypotheses delineation, preparation and design of the study, in writing the article and in its revision prior to submission.

LR is involved in the preparation and design of the study and of biological analyses, and in the revision of this manuscript prior to submission.

LB is involved in the preparation of the study, in the preparation of drugs used in this study and in the revision of this manuscript prior to submission.

LB is involved in the conception, preparation and design of the study, and in the revision of this manuscript prior to submission.

CH is involved in the conception, preparation and design of the study, and in the revision of this manuscript prior to submission.

SJ is involved in the conception, preparation and design of the study, and in the revision of this manuscript prior to submission.

JYL is involved in the conception, preparation and design of the study, and in the revision of this manuscript prior to submission.

RC is involved in the conception, preparation and design of the study, and in the revision of this manuscript prior to submission.

1  
2  
3 PMB is involved in the conception, preparation and design of the study, and in the revision of  
4  
5 this manuscript prior to submission.  
6

7 PFL is involved in the conception, preparation and design of the study, and in the revision of  
8  
9 this manuscript prior to submission.  
10

11 PG is involved in the conception, preparation and design of the study, and in the revision of  
12  
13 this manuscript prior to submission.  
14

15 PED is involved in the conception, preparation and design of the study, and in the revision of  
16  
17 this manuscript prior to submission.  
18

19 EE is involved in the conception, preparation and design of the study, and in the revision of  
20  
21 this manuscript prior to submission.  
22

23 AS is involved in the conception, preparation and design of the study, and in the revision of  
24  
25 this manuscript prior to submission.  
26

27 DM is involved in the preparation and design of the study, in writing the article and in its  
28  
29 revision prior to submission.  
30

31 VS is involved in the preparation and design of the study and of biological analyses, and in  
32  
33 the revision of this manuscript prior to submission.  
34

35 JMC is involved in the conception, hypotheses delineation, preparation and design of the  
36  
37 study, in writing the article and in its revision prior to submission.  
38

39 MJ is involved in the conception, hypotheses delineation, preparation and design of the study  
40  
41 and of statistical analyses, in writing the article and in its revision prior to submission. MJ  
42  
43 takes responsibility for the content of the manuscript.  
44  
45  
46  
47  
48  
49  
50  
51  
52  
53  
54  
55  
56  
57  
58  
59  
60

## REFERENCES

- 1 Chan A-W, Tetzlaff JM, Gøtzsche PC, *et al.* SPIRIT 2013 explanation and elaboration: guidance for protocols of clinical trials. *BMJ* 2013;**346**:e7586.
- 2 Peery AF, Dellon ES, Lund J, *et al.* Burden of gastrointestinal disease in the United States: 2012 update. *Gastroenterology* 2012;**143**:1179–87.e1–3.
- 3 Swaroop VS, Chari ST, Clain JE. Severe acute pancreatitis. *JAMA* 2004;**291**:2865–8.
- 4 Lankisch PG, Apte M, Banks PA. Acute pancreatitis. *Lancet* 2015;**386**:85–96.
- 5 Acute Respiratory Distress Syndrome: The Berlin Definition. *JAMA* 2012;**307**. doi:10.1001/jama.2012.5669
- 6 Whitcomb DC. Clinical practice. Acute pancreatitis. *N Engl J Med* 2006;**354**:2142–50.
- 7 Baron TH, Morgan DE. Acute necrotizing pancreatitis. *N Engl J Med* 1999;**340**:1412–7.
- 8 Dombernowsky T, Kristensen MØ, Rysgaard S, *et al.* Risk factors for and impact of respiratory failure on mortality in the early phase of acute pancreatitis. *Pancreatology* Published Online First: 8 July 2016. doi:10.1016/j.pan.2016.06.664
- 9 Klar E, Schratt W, Foitzik T, *et al.* Impact of microcirculatory flow pattern changes on the development of acute edematous and necrotizing pancreatitis in rabbit pancreas. *Dig Dis Sci* 1994;**39**:2639–44.
- 10 Banks PA, Bollen TL, Dervenis C, *et al.* Classification of acute pancreatitis--2012: revision of the Atlanta classification and definitions by international consensus. *Gut* 2013;**62**:102–11.
- 11 Lund H, Tønnesen H, Tønnesen MH, *et al.* Long-term recurrence and death rates after acute pancreatitis. *Scand J Gastroenterol* 2006;**41**:234–8.
- 12 Jung B, Carr J, Chanques G, *et al.* [Severe and acute pancreatitis admitted in intensive care: a prospective epidemiological multiple centre study using CClin network database]. *Ann Fr Anesth Reanim* 2011;**30**:105–12.

- 1  
2  
3 13 Tenner S, Baillie J, DeWitt J, *et al.* American College of Gastroenterology guideline:  
4 management of acute pancreatitis. *Am J Gastroenterol* 2013;**108**:1400–15; 1416.  
5  
6  
7 14 Clemente A, Carli F. The physiological effects of thoracic epidural anesthesia and  
8 analgesia on the cardiovascular, respiratory and gastrointestinal systems. *Minerva*  
9 *Anesthesiol* 2008;**74**:549–63.  
10  
11  
12  
13 15 Bardia A, Sood A, Mahmood F, *et al.* Combined Epidural-General Anesthesia vs  
14 General Anesthesia Alone for Elective Abdominal Aortic Aneurysm Repair. *JAMA Surg*  
15 Published Online First: 7 September 2016. doi:10.1001/jamasurg.2016.2733  
16  
17  
18  
19 16 Von Dossow V, Welte M, Zaune U, *et al.* Thoracic epidural anesthesia combined with  
20 general anesthesia: the preferred anesthetic technique for thoracic surgery. *Anesth Analg*  
21 2001;**92**:848–54.  
22  
23  
24  
25 17 Rodgers A, Walker N, Schug S, *et al.* Reduction of postoperative mortality and  
26 morbidity with epidural or spinal anaesthesia: results from overview of randomised  
27 trials. *BMJ* 2000;**321**:1493.  
28  
29  
30  
31 18 Jabaudon M, Chabanne R, Sossou A, *et al.* Epidural analgesia in the intensive care unit:  
32 An observational series of 121 patients. *Anaesth Crit Care Pain Med* 2015;**34**:217–23.  
33  
34  
35 19 Bernhardt A, Kortgen A, Niesel HC, *et al.* [Using epidural anesthesia in patients with  
36 acute pancreatitis--prospective study of 121 patients]. *Anaesthesiol Reanim* 2002;**27**:16–  
37 22.  
38  
39  
40  
41 20 Sadowski SM, Andres A, Morel P, *et al.* Epidural anesthesia improves pancreatic  
42 perfusion and decreases the severity of acute pancreatitis. *World J Gastroenterol*  
43 2015;**21**:12448–56.  
44  
45  
46  
47 21 Windisch O, Heidegger C-P, Giraud R, *et al.* Thoracic epidural analgesia: a new  
48 approach for the treatment of acute pancreatitis? *Crit Care* 2016;**20**:116.  
49  
50  
51  
52 22 Demirag A, Pastor CM, Morel P, *et al.* Epidural anaesthesia restores pancreatic  
53 microcirculation and decreases the severity of acute pancreatitis. *World J Gastroenterol*  
54 2006;**12**:915–20.  
55  
56  
57  
58 23 Bachmann KA, Trepte CJC, Tomkötter L, *et al.* Effects of thoracic epidural anesthesia  
59  
60

- 1  
2  
3 on survival and microcirculation in severe acute pancreatitis: a randomized experimental  
4 trial. *Crit Care* 2013;**17**:R281.  
5  
6  
7 24 Ai K, Kotake Y, Satoh T, *et al.* Epidural anesthesia retards intestinal acidosis and  
8 reduces portal vein endotoxin concentrations during progressive hypoxia in rabbits.  
9 *Anesthesiology* 2001;**94**:263–9.  
10  
11  
12  
13 25 Freise H, Lauer S, Anthonsen S, *et al.* Thoracic epidural analgesia augments ileal  
14 mucosal capillary perfusion and improves survival in severe acute pancreatitis in rats.  
15 *Anesthesiology* 2006;**105**:354–9.  
16  
17  
18  
19 26 Freise H, Lauer S, Konietzny E, *et al.* Hepatic effects of thoracic epidural analgesia in  
20 experimental severe acute pancreatitis. *Anesthesiology* 2009;**111**:1249–56.  
21  
22  
23  
24 27 Enigk F, Wagner A, Samapati R, *et al.* Thoracic epidural anesthesia decreases  
25 endotoxin-induced endothelial injury. *BMC Anesthesiol* 2014;**14**:23.  
26  
27  
28 28 Schäper J, Wagner A, Enigk F, *et al.* Regional sympathetic blockade attenuates  
29 activation of intestinal macrophages and reduces gut barrier failure. *Anesthesiology*  
30 2013;**118**:134–42.  
31  
32  
33  
34 29 Greenberg JA, Hsu J, Bawazeer M, *et al.* Clinical practice guideline: management of  
35 acute pancreatitis. *Can J Surg* 2016;**59**:128–40.  
36  
37  
38 30 Zerem E. Treatment of severe acute pancreatitis and its complications. *World J*  
39 *Gastroenterol* 2014;**20**:13879–92.  
40  
41  
42  
43 31 Working Group IAP/APA Acute Pancreatitis Guidelines. IAP/APA evidence-based  
44 guidelines for the management of acute pancreatitis. *Pancreatology* 2013;**13**:e1–15.  
45  
46  
47 32 Payen JF, Bru O, Bosson JL, *et al.* Assessing pain in critically ill sedated patients by  
48 using a behavioral pain scale. *Crit Care Med* 2001;**29**:2258–63.  
49  
50  
51 33 Aïssaoui Y, Zeggwagh AA, Zekraoui A, *et al.* Validation of a behavioral pain scale in  
52 critically ill, sedated, and mechanically ventilated patients. *Anesth Analg*  
53 2005;**101**:1470–6.  
54  
55  
56  
57 34 WHO's cancer pain ladder for adults.  
58  
59  
60

- 2013.<http://www.who.int/cancer/palliative/painladder/en/> (accessed 6 Oct2016).
- 35 Wu CL, Cohen SR, Richman JM, *et al.* Efficacy of postoperative patient-controlled and continuous infusion epidural analgesia versus intravenous patient-controlled analgesia with opioids: a meta-analysis. *Anesthesiology* 2005;**103**:1079–88; quiz 1109–10.
- 36 Figueiredo S, Benhamou D. Epidural analgesia in ICU: Useful and effective probably, safe maybe. *Anaesth Crit Care Pain Med* 2015;**34**:185–6.
- 37 Dellinger RP, Levy MM, Rhodes A, *et al.* Surviving sepsis campaign: international guidelines for management of severe sepsis and septic shock: 2012. *Crit Care Med* 2013;**41**:580–637.
- 38 Kellum JA, Lameire N, KDIGO AKI Guideline Work Group. Diagnosis, evaluation, and management of acute kidney injury: a KDIGO summary (Part 1). *Crit Care* 2013;**17**:204.
- 39 Sessler CN, Gosnell MS, Grap MJ, *et al.* The Richmond Agitation-Sedation Scale: validity and reliability in adult intensive care unit patients. *Am J Respir Crit Care Med* 2002;**166**:1338–44.
- 40 Ely EW, Truman B, Shintani A, *et al.* Monitoring sedation status over time in ICU patients: reliability and validity of the Richmond Agitation-Sedation Scale (RASS). *JAMA* 2003;**289**:2983–91.
- 41 Zhang H, Neuhöfer P, Song L, *et al.* IL-6 trans-signaling promotes pancreatitis-associated lung injury and lethality. *J Clin Invest* 2013;**123**:1019–31.
- 42 Uchida T, Shirasawa M, Ware LB, *et al.* Receptor for advanced glycation end-products is a marker of type I cell injury in acute lung injury. *Am J Respir Crit Care Med* 2006;**173**:1008–15.
- 43 Jabaudon M, Blondonnet R, Roszyk L, *et al.* Soluble Receptor for Advanced Glycation End-Products Predicts Impaired Alveolar Fluid Clearance in Acute Respiratory Distress Syndrome. *Am J Respir Crit Care Med* 2015;**192**:191–9.
- 44 Haase M, Bellomo R, Devarajan P, *et al.* Accuracy of neutrophil gelatinase-associated lipocalin (NGAL) in diagnosis and prognosis in acute kidney injury: a systematic review

- 1  
2  
3 and meta-analysis. *Am J Kidney Dis* 2009;**54**:1012–24.  
4  
5  
6 45 Constantin J-M, Futier E, Perbet S, *et al.* Plasma neutrophil gelatinase-associated  
7 lipocalin is an early marker of acute kidney injury in adult critically ill patients: a  
8 prospective study. *J Crit Care* 2010;**25**:176.e1–6.  
9  
10  
11 46 Vijayan A, Faubel S, Askenazi DJ, *et al.* Clinical Use of the Urine Biomarker [TIMP-2]  
12 × [IGFBP7] for Acute Kidney Injury Risk Assessment. *Am J Kidney Dis* 2016;**68**:19–  
13 28.  
14  
15  
16  
17 47 Marshall JC, Cook DJ, Christou NV, *et al.* Multiple organ dysfunction score: a reliable  
18 descriptor of a complex clinical outcome. *Crit Care Med* 1995;**23**:1638–52.  
19  
20  
21  
22 48 Working Party of the British Society of Gastroenterology, Association of Surgeons of  
23 Great Britain and Ireland, Pancreatic Society of Great Britain and Ireland, *et al.* UK  
24 guidelines for the management of acute pancreatitis. *Gut* 2005;**54 Suppl 3**:iii1–9.  
25  
26  
27  
28 49 Jouve P, Bazin J-E, Petit A, *et al.* Epidural versus continuous preperitoneal analgesia  
29 during fast-track open colorectal surgery: a randomized controlled trial. *Anesthesiology*  
30 2013;**118**:622–30.  
31  
32  
33  
34 50 Harris PA, Taylor R, Thielke R, *et al.* Research electronic data capture (REDCap)--a  
35 metadata-driven methodology and workflow process for providing translational research  
36 informatics support. *J Biomed Inform* 2009;**42**:377–81.  
37  
38  
39  
40 51 Sauder P, Andreoletti M, Cambonie G, *et al.* Sédation-analgésie en réanimation  
41 (nouveau-né exclu). *Annales Françaises d'Anesthésie et de Réanimation* 2008;**27**:541–  
42 51.  
43  
44  
45  
46 52 Richards ER, Kabir SI, McNaught C-E, *et al.* Effect of thoracic epidural anaesthesia on  
47 splanchnic blood flow. *Br J Surg* 2013;**100**:316–21.  
48  
49  
50 53 Freise H, Van Aken HK. Risks and benefits of thoracic epidural anaesthesia. *Br J*  
51 *Anaesth* 2011;**107**:859–68.  
52  
53  
54 54 Low JHS. Survey of epidural analgesia management in general intensive care units in  
55 England. *Acta Anaesthesiol Scand* 2002;**46**:799–805.  
56  
57  
58  
59  
60



1  
2  
3 **FIGURE LEGENDS**  
4  
5  
6

7 **FIGURE 1.** CONSORT diagram of the EPIPAN trial illustrating the randomisation and flow  
8 of patients in the study.  
9  
10  
11  
12  
13  
14  
15  
16  
17  
18  
19  
20  
21  
22  
23  
24  
25  
26  
27  
28  
29  
30  
31  
32  
33  
34  
35  
36  
37  
38  
39  
40  
41  
42  
43  
44  
45  
46  
47  
48  
49  
50  
51  
52  
53  
54  
55  
56  
57  
58  
59  
60

For peer review only

## TABLE

|                                                                                 | Inclusion (day 0) | Day 1 | Day 2 | Day 3 | Day 4 | Day 5 | Day 6 | Day 7 | Day 15 | Day 30 |
|---------------------------------------------------------------------------------|-------------------|-------|-------|-------|-------|-------|-------|-------|--------|--------|
| Informed consent                                                                | X                 |       |       |       |       |       |       |       |        |        |
| Eligibility: check inclusion and exclusion criteria                             | X                 |       |       |       |       |       |       |       |        |        |
| Randomisation                                                                   | X                 |       |       |       |       |       |       |       |        |        |
| Filling of case report forms (including data on EA in the interventional group) | X                 | X     | X     | X     | X     | X     | X     | X     | X      | X      |
| Sampling of blood and urine specimens                                           | X                 |       | X     |       |       |       |       | X     |        |        |
| Complications of acute pancreatitis and survival status                         |                   |       |       |       |       |       |       |       | X      | X      |
| End of study                                                                    |                   |       |       |       |       |       |       |       |        | X      |

Table 1. Participant timeline

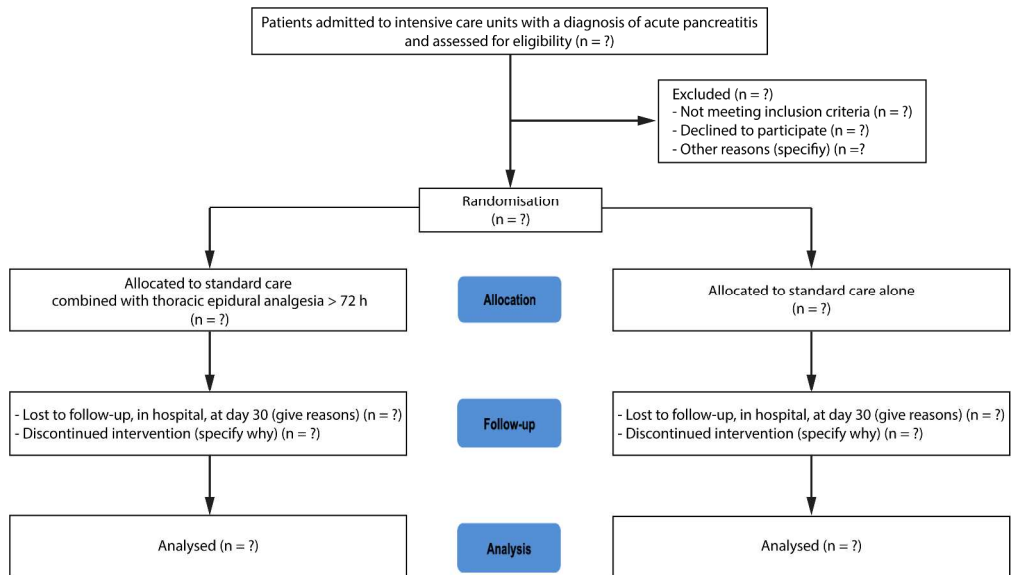

FIGURE 1. CONSORT diagram of the EPIPAN trial illustrating the randomisation and flow of patients in the study.

275x157mm (300 x 300 DPI)

Review only

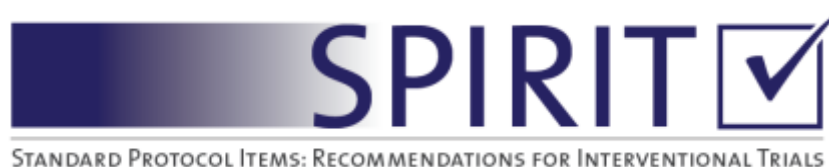

SPIRIT 2013 Checklist: Recommended items to address in a clinical trial protocol and related documents\*

| Section/item                      | Item No | Description                                                                                                                                                                                                                                                                                                            |
|-----------------------------------|---------|------------------------------------------------------------------------------------------------------------------------------------------------------------------------------------------------------------------------------------------------------------------------------------------------------------------------|
| <b>Administrative information</b> |         |                                                                                                                                                                                                                                                                                                                        |
| Title                             | 1       | Descriptive title identifying the study design, population, interventions, and, if applicable, trial acronym – <a href="#">PAGE 1</a>                                                                                                                                                                                  |
| Trial registration                | 2a      | Trial identifier and registry name. If not yet registered, name of intended registry – <a href="#">PAGES 6 and 21</a>                                                                                                                                                                                                  |
|                                   | 2b      | All items from the World Health Organization Trial Registration Data Set – <a href="#">PAGE 21</a>                                                                                                                                                                                                                     |
| Protocol version                  | 3       | Date and version identifier – <a href="#">PAGE 21</a>                                                                                                                                                                                                                                                                  |
| Funding                           | 4       | Sources and types of financial, material, and other support – <a href="#">PAGES 22-23</a>                                                                                                                                                                                                                              |
| Roles and responsibilities        | 5a      | Names, affiliations, and roles of protocol contributors – <a href="#">PAGES 1, 2 and 27</a>                                                                                                                                                                                                                            |
|                                   | 5b      | Name and contact information for the trial sponsor – <a href="#">PAGES 1 and 22</a>                                                                                                                                                                                                                                    |
|                                   | 5c      | Role of study sponsor and funders, if any, in study design; collection, management, analysis, and interpretation of data; writing of the report; and the decision to submit the report for publication, including whether they will have ultimate authority over any of these activities – <a href="#">PAGES 22-23</a> |
|                                   | 5d      | Composition, roles, and responsibilities of the coordinating centre, steering committee, endpoint adjudication committee, data management team, and other individuals or groups overseeing the trial, if applicable (see Item 21a for data monitoring committee) – <a href="#">PAGES 20-21</a>                         |
| <b>Introduction</b>               |         |                                                                                                                                                                                                                                                                                                                        |
| Background and rationale          | 6a      | Description of research question and justification for undertaking the trial, including summary of relevant studies (published and unpublished) examining benefits and harms for each intervention – <a href="#">PAGES 7-8-9</a>                                                                                       |
|                                   | 6b      | Explanation for choice of comparators – <a href="#">PAGES 8-9</a>                                                                                                                                                                                                                                                      |
| Objectives                        | 7       | Specific objectives or hypotheses – <a href="#">PAGES 9-10</a>                                                                                                                                                                                                                                                         |

1  
2  
3  
4  
5  
6  
7  
8  
9  
10  
11  
12  
13  
14  
15  
16  
17  
18  
19  
20  
21  
22  
23  
24  
25  
26  
27  
28  
29  
30  
31  
32  
33  
34  
35  
36  
37  
38  
39  
40  
41  
42  
43  
44  
45  
46  
47  
48  
49  
50  
51  
52  
53  
54  
55  
56  
57  
58  
59  
60

Trial design 8 Description of trial design including type of trial (eg, parallel group, crossover, factorial, single group), allocation ratio, and framework (eg, superiority, equivalence, noninferiority, exploratory) – [PAGE 10](#)

### Methods: Participants, interventions, and outcomes

Study setting 9 Description of study settings (eg, community clinic, academic hospital) and list of countries where data will be collected. Reference to where list of study sites can be obtained – [PAGE 11](#)

Eligibility criteria 10 Inclusion and exclusion criteria for participants. If applicable, eligibility criteria for study centres and individuals who will perform the interventions (eg, surgeons, psychotherapists) – [PAGE 11](#)

Interventions 11a Interventions for each group with sufficient detail to allow replication, including how and when they will be administered – [PAGES 11-12-13](#)

11b Criteria for discontinuing or modifying allocated interventions for a given trial participant (eg, drug dose change in response to harms, participant request, or improving/worsening disease) – [PAGES 21-22](#)

11c Strategies to improve adherence to intervention protocols, and any procedures for monitoring adherence (eg, drug tablet return, laboratory tests) – [PAGES 12-25-26](#)

11d Relevant concomitant care and interventions that are permitted or prohibited during the trial – [PAGES 11-12-13](#)

Outcomes 12 Primary, secondary, and other outcomes, including the specific measurement variable (eg, systolic blood pressure), analysis metric (eg, change from baseline, final value, time to event), method of aggregation (eg, median, proportion), and time point for each outcome. Explanation of the clinical relevance of chosen efficacy and harm outcomes is strongly recommended – [PAGES 13-14](#)

Participant timeline 13 Time schedule of enrolment, interventions (including any run-ins and washouts), assessments, and visits for participants. A schematic diagram is highly recommended (see Figure) – [PAGES 14 and Table 1](#)

Sample size 14 Estimated number of participants needed to achieve study objectives and how it was determined, including clinical and statistical assumptions supporting any sample size calculations – [PAGE 14](#)

Recruitment 15 Strategies for achieving adequate participant enrolment to reach target sample size – [PAGES 14-15](#)

## Methods: Assignment of interventions (for controlled trials)

### Allocation:

- |                                  |     |                                                                                                                                                                                                                                                                                                                                                                                    |
|----------------------------------|-----|------------------------------------------------------------------------------------------------------------------------------------------------------------------------------------------------------------------------------------------------------------------------------------------------------------------------------------------------------------------------------------|
| Sequence generation              | 16a | Method of generating the allocation sequence (eg, computer-generated random numbers), and list of any factors for stratification. To reduce predictability of a random sequence, details of any planned restriction (eg, blocking) should be provided in a separate document that is unavailable to those who enrol participants or assign interventions – <a href="#">PAGE 16</a> |
| Allocation concealment mechanism | 16b | Mechanism of implementing the allocation sequence (eg, central telephone; sequentially numbered, opaque, sealed envelopes), describing any steps to conceal the sequence until interventions are assigned – <a href="#">PAGE 16</a>                                                                                                                                                |
| Implementation                   | 16c | Who will generate the allocation sequence, who will enrol participants, and who will assign participants to interventions – <a href="#">PAGE 16</a>                                                                                                                                                                                                                                |
| Blinding (masking)               | 17a | Who will be blinded after assignment to interventions (eg, trial participants, care providers, outcome assessors, data analysts), and how – <a href="#">PAGE 16</a>                                                                                                                                                                                                                |
|                                  | 17b | If blinded, circumstances under which unblinding is permissible, and procedure for revealing a participant's allocated intervention during the trial – <a href="#">PAGE 16</a>                                                                                                                                                                                                     |

## Methods: Data collection, management, and analysis

- |                         |     |                                                                                                                                                                                                                                                                                                                                                                                                                                        |
|-------------------------|-----|----------------------------------------------------------------------------------------------------------------------------------------------------------------------------------------------------------------------------------------------------------------------------------------------------------------------------------------------------------------------------------------------------------------------------------------|
| Data collection methods | 18a | Plans for assessment and collection of outcome, baseline, and other trial data, including any related processes to promote data quality (eg, duplicate measurements, training of assessors) and a description of study instruments (eg, questionnaires, laboratory tests) along with their reliability and validity, if known. Reference to where data collection forms can be found, if not in the protocol – <a href="#">PAGE 17</a> |
|                         | 18b | Plans to promote participant retention and complete follow-up, including list of any outcome data to be collected for participants who discontinue or deviate from intervention protocols – <a href="#">PAGE 17</a>                                                                                                                                                                                                                    |
| Data management         | 19  | Plans for data entry, coding, security, and storage, including any related processes to promote data quality (eg, double data entry; range checks for data values). Reference to where details of data management procedures can be found, if not in the protocol – <a href="#">PAGE 17</a>                                                                                                                                            |
| Statistical methods     | 20a | Statistical methods for analysing primary and secondary outcomes. Reference to where other details of the statistical analysis plan can be found, if not in the protocol – <a href="#">PAGES 18-19</a>                                                                                                                                                                                                                                 |
|                         | 20b | Methods for any additional analyses (eg, subgroup and adjusted analyses) – <a href="#">PAGES 18-19</a>                                                                                                                                                                                                                                                                                                                                 |

- 1  
2  
3  
4  
5  
6  
7  
8  
9  
10  
11  
12  
13  
14  
15  
16  
17  
18  
19  
20  
21  
22  
23  
24  
25  
26  
27  
28  
29  
30  
31  
32  
33  
34  
35  
36  
37  
38  
39  
40  
41  
42  
43  
44  
45  
46  
47  
48  
49  
50  
51  
52  
53  
54  
55  
56  
57  
58  
59  
60
- 20c Definition of analysis population relating to protocol non-adherence (eg, as randomised analysis), and any statistical methods to handle missing data (eg, multiple imputation) – [PAGES 18-19](#)

## Methods: Monitoring

- Data monitoring 21a Composition of data monitoring committee (DMC); summary of its role and reporting structure; statement of whether it is independent from the sponsor and competing interests; and reference to where further details about its charter can be found, if not in the protocol. Alternatively, an explanation of why a DMC is not needed – [PAGES 21-22](#)
- 21b Description of any interim analyses and stopping guidelines, including who will have access to these interim results and make the final decision to terminate the trial – [PAGES 18 and 21](#)
- Harms 22 Plans for collecting, assessing, reporting, and managing solicited and spontaneously reported adverse events and other unintended effects of trial interventions or trial conduct – [PAGES 21-22](#)
- Auditing 23 Frequency and procedures for auditing trial conduct, if any, and whether the process will be independent from investigators and the sponsor – [PAGES 21-22](#)

## Ethics and dissemination

- Research ethics approval 24 Plans for seeking research ethics committee/institutional review board (REC/IRB) approval – [PAGE 23](#)
- Protocol amendments 25 Plans for communicating important protocol modifications (eg, changes to eligibility criteria, outcomes, analyses) to relevant parties (eg, investigators, REC/IRBs, trial participants, trial registries, journals, regulators) – [PAGE 23](#)
- Consent or assent 26a Who will obtain informed consent or assent from potential trial participants or authorised surrogates, and how (see Item 32) – [PAGE 23](#)
- 26b Additional consent provisions for collection and use of participant data and biological specimens in ancillary studies, if applicable – [PAGE 23](#)

|    |                   |     |                                                                              |
|----|-------------------|-----|------------------------------------------------------------------------------|
| 1  |                   |     |                                                                              |
| 2  | Confidentiality   | 27  | How personal information about potential and enrolled participants will      |
| 3  |                   |     | be collected, shared, and maintained in order to protect confidentiality     |
| 4  |                   |     | before, during, and after the trial – <a href="#">PAGES 23-24</a>            |
| 5  |                   |     |                                                                              |
| 6  | Declaration of    | 28  | Financial and other competing interests for principal investigators for      |
| 7  | interests         |     | the overall trial and each study site – <a href="#">PAGE 24</a>              |
| 8  |                   |     |                                                                              |
| 9  | Access to data    | 29  | Statement of who will have access to the final trial dataset, and            |
| 10 |                   |     | disclosure of contractual agreements that limit such access for              |
| 11 |                   |     | investigators – <a href="#">PAGE 24</a>                                      |
| 12 |                   |     |                                                                              |
| 13 | Ancillary and     | 30  | Provisions, if any, for ancillary and post-trial care, and for               |
| 14 | post-trial care   |     | compensation to those who suffer harm from trial participation –             |
| 15 |                   |     | <a href="#">PAGE 23</a>                                                      |
| 16 |                   |     |                                                                              |
| 17 | Dissemination     | 31a | Plans for investigators and sponsor to communicate trial results to          |
| 18 | policy            |     | participants, healthcare professionals, the public, and other relevant       |
| 19 |                   |     | groups (eg, via publication, reporting in results databases, or other        |
| 20 |                   |     | data sharing arrangements), including any publication restrictions –         |
| 21 |                   |     | <a href="#">PAGE 24</a>                                                      |
| 22 |                   |     |                                                                              |
| 23 |                   | 31b | Authorship eligibility guidelines and any intended use of professional       |
| 24 |                   |     | writers – <a href="#">PAGE 24</a>                                            |
| 25 |                   |     |                                                                              |
| 26 |                   | 31c | Plans, if any, for granting public access to the full protocol, participant- |
| 27 |                   |     | level dataset, and statistical code – <a href="#">PAGE 24</a>                |
| 28 |                   |     |                                                                              |
| 29 |                   |     |                                                                              |
| 30 |                   |     |                                                                              |
| 31 |                   |     |                                                                              |
| 32 |                   |     |                                                                              |
| 33 | <b>Appendices</b> |     |                                                                              |
| 34 |                   |     |                                                                              |
| 35 | Informed consent  | 32  | Model consent form and other related documentation given to                  |
| 36 | materials         |     | participants and authorised surrogates – <a href="#">Appendix</a>            |
| 37 |                   |     |                                                                              |
| 38 | Biological        | 33  | Plans for collection, laboratory evaluation, and storage of biological       |
| 39 | specimens         |     | specimens for genetic or molecular analysis in the current trial and for     |
| 40 |                   |     | future use in ancillary studies, if applicable – <a href="#">Table 1</a>     |
| 41 |                   |     |                                                                              |
| 42 |                   |     |                                                                              |
| 43 |                   |     |                                                                              |

---

\*It is strongly recommended that this checklist be read in conjunction with the SPIRIT 2013 Explanation & Elaboration for important clarification on the items. Amendments to the protocol should be tracked and dated. The SPIRIT checklist is copyrighted by the SPIRIT Group under the Creative Commons "[Attribution-NonCommercial-NoDerivs 3.0 Unported](#)" license.



# BMJ Open

## Epidural analgesia in critically ill patients with acute pancreatitis: the multicentre randomised controlled EPIPAN study protocol

|                               |                                                                                                                                                                                                                                                                                                                                                                                                                                                                                                                                                                                                                                                                                                                                                                                                                                                                                                                                                                                                                                                                                                                                                                                                                                                                                                                                                                                                                                                                                                                                                                                                                                                                                                                                                                                                                                                                                                                                                                                                                                                                                                                                                                                                                                                                                                                                                                                                                                                                                                                                                                                                                        |
|-------------------------------|------------------------------------------------------------------------------------------------------------------------------------------------------------------------------------------------------------------------------------------------------------------------------------------------------------------------------------------------------------------------------------------------------------------------------------------------------------------------------------------------------------------------------------------------------------------------------------------------------------------------------------------------------------------------------------------------------------------------------------------------------------------------------------------------------------------------------------------------------------------------------------------------------------------------------------------------------------------------------------------------------------------------------------------------------------------------------------------------------------------------------------------------------------------------------------------------------------------------------------------------------------------------------------------------------------------------------------------------------------------------------------------------------------------------------------------------------------------------------------------------------------------------------------------------------------------------------------------------------------------------------------------------------------------------------------------------------------------------------------------------------------------------------------------------------------------------------------------------------------------------------------------------------------------------------------------------------------------------------------------------------------------------------------------------------------------------------------------------------------------------------------------------------------------------------------------------------------------------------------------------------------------------------------------------------------------------------------------------------------------------------------------------------------------------------------------------------------------------------------------------------------------------------------------------------------------------------------------------------------------------|
| Journal:                      | <i>BMJ Open</i>                                                                                                                                                                                                                                                                                                                                                                                                                                                                                                                                                                                                                                                                                                                                                                                                                                                                                                                                                                                                                                                                                                                                                                                                                                                                                                                                                                                                                                                                                                                                                                                                                                                                                                                                                                                                                                                                                                                                                                                                                                                                                                                                                                                                                                                                                                                                                                                                                                                                                                                                                                                                        |
| Manuscript ID                 | bmjopen-2016-015280.R1                                                                                                                                                                                                                                                                                                                                                                                                                                                                                                                                                                                                                                                                                                                                                                                                                                                                                                                                                                                                                                                                                                                                                                                                                                                                                                                                                                                                                                                                                                                                                                                                                                                                                                                                                                                                                                                                                                                                                                                                                                                                                                                                                                                                                                                                                                                                                                                                                                                                                                                                                                                                 |
| Article Type:                 | Protocol                                                                                                                                                                                                                                                                                                                                                                                                                                                                                                                                                                                                                                                                                                                                                                                                                                                                                                                                                                                                                                                                                                                                                                                                                                                                                                                                                                                                                                                                                                                                                                                                                                                                                                                                                                                                                                                                                                                                                                                                                                                                                                                                                                                                                                                                                                                                                                                                                                                                                                                                                                                                               |
| Date Submitted by the Author: | 26-Jan-2017                                                                                                                                                                                                                                                                                                                                                                                                                                                                                                                                                                                                                                                                                                                                                                                                                                                                                                                                                                                                                                                                                                                                                                                                                                                                                                                                                                                                                                                                                                                                                                                                                                                                                                                                                                                                                                                                                                                                                                                                                                                                                                                                                                                                                                                                                                                                                                                                                                                                                                                                                                                                            |
| Complete List of Authors:     | <p>Bulyez, Stéphanie; Centre Hospitalier Universitaire de Clermont-Ferrand, Department of Perioperative Medicine</p> <p>Pereira, Bruno; Centre Hospitalier Universitaire de Clermont-Ferrand, Department of Clinical Research and Innovation (DRCI)</p> <p>Caumon, Elodie; Centre Hospitalier Universitaire de Clermont-Ferrand, Department of Clinical Research and Innovation (DRCI)</p> <p>Imhoff, Etienne; Centre Hospitalier Universitaire de Clermont-Ferrand, Department of Perioperative Medicine</p> <p>Roszyk, Laurence; Centre Hospitalier Universitaire de Clermont-Ferrand, Department of Medical Biochemistry and Molecular Biology; Université d'Auvergne Faculte de Medecine, EA7281, R2D2, GReD</p> <p>Bernard, Lise; Centre Hospitalier Universitaire de Clermont-Ferrand, Pôle Pharmacie; Clermont Université, Université d'Auvergne, EA 4676, C-Biosenss</p> <p>Bühler, Leo; Hopitaux Universitaires de Geneve, Department of Surgery</p> <p>Heidegger, Claudia; Hopitaux Universitaires de Geneve, Division of Intensive Care</p> <p>Jaber, S.; Centre Hospitalier Regional Universitaire de Montpellier, Department of Anesthesiology and Critical Care Medicine B (DAR B), Saint-Eloi teaching hospital; Université de Montpellier, INSERM U-1046</p> <p>LEFRANT, Jean Yves; Centre Hospitalier Universitaire de Nimes, Division of Anesthesiology, Critical Care, Pain and Emergency Medicine; Université de Montpellier Faculte de Medecine - Site de Nimes, EA 2992</p> <p>Chabanne, Russell; Centre Hospitalier Universitaire de Clermont-Ferrand, Department of Perioperative Medicine</p> <p>Bertrand, Pierre-Marie; Centre Hospitalier de Cannes, Intensive Care Unit</p> <p>Laterre, Pierre-François; Cliniques Universitaires Saint-Luc, Department of Critical Care Medicine</p> <p>Guerci, Philippe; Centre Hospitalier Universitaire de Nancy, Department of Anesthesiology and Intensive Care Medicine</p> <p>Danin, Pierre-Eric; Centre Hospitalier Universitaire de Nice, Anesthesia and Surgical Intensive Care, Nice Archet 2; Université de Nice Faculte de Medecine, INSERM U1065, team 8</p> <p>Escudier, Etienne; Centre Hospitalier Annecy Genevois, Intensive Care Unit</p> <p>Sossou, Achille; Centre Hospitalier Emile Roux, Department of Anesthesiology and Critical Care Medicine</p> <p>Morand, Dominique; Centre Hospitalier Universitaire de Clermont-Ferrand, Department of Clinical Research and Innovation (DRCI)</p> <p>Sapin, Vincent; CHU Clermont-Ferrand, Department of Medical Biochemistry and Molecular Biology; Université d'Auvergne Faculte de</p> |

|                                 |                                                                                                                                                                                                                                                                                                                                                                                                     |
|---------------------------------|-----------------------------------------------------------------------------------------------------------------------------------------------------------------------------------------------------------------------------------------------------------------------------------------------------------------------------------------------------------------------------------------------------|
|                                 | Medecine, EA7281, R2D2, GReD<br>Constantin, Jean-Michel; Centre Hospitalier Universitaire de Clermont-Ferrand, Department of Perioperative Medicine; Universite d'Auvergne Faculte de Medecine, EA7281, R2D2, GReD<br>Jabaudon, Matthieu; Centre Hospitalier Universitaire de Clermont-Ferrand, Department of Perioperative Medicine; Universite d'Auvergne Faculte de Medecine, EA7281, R2D2, GReD |
| <b>Primary Subject Heading</b>: | Intensive care                                                                                                                                                                                                                                                                                                                                                                                      |
| Secondary Subject Heading:      | Anaesthesia, Gastroenterology and hepatology                                                                                                                                                                                                                                                                                                                                                        |
| Keywords:                       | Acute pancreatitis, Epidural analgesia, Randomised controlled trial, Intensive care unit                                                                                                                                                                                                                                                                                                            |
|                                 |                                                                                                                                                                                                                                                                                                                                                                                                     |

SCHOLARONE™  
Manuscripts

1  
2  
3 **Epidural analgesia in critically ill patients with acute pancreatitis:**  
4  
5 **the multicentre randomised controlled EPIPAN study protocol**  
6  
7

8  
9 Stéphanie Bulyez<sup>1</sup>, Bruno Pereira<sup>2</sup>, Elodie Caumon<sup>2</sup>, Etienne Imhoff<sup>1</sup>, Laurence Roszyk<sup>3,4</sup>,  
10 Lise Bernard<sup>5,6</sup>, Leo Bühler<sup>7</sup>, Claudia Heidegger<sup>8</sup>, Samir Jaber<sup>9</sup>, Jean-Yves Lefrant<sup>10</sup>, Russell  
11 Chabanne<sup>1</sup>, Pierre-Marie Bertrand<sup>11</sup>, Pierre-François Laterre<sup>12</sup>, Philippe Guerci<sup>13</sup>, Pierre-Eric  
12 Danin<sup>14</sup>, Etienne Escudier<sup>15</sup>, Achille Sossou<sup>16</sup>, Dominique Morand<sup>2</sup>, Vincent Sapin<sup>3,4</sup>, Jean-  
13 Michel Constantin<sup>1,4</sup>, Matthieu Jabaudon<sup>1,4</sup> for the EPIPAN study group and the AzuRea  
14 network  
15  
16  
17  
18  
19  
20  
21

22  
23  
24  
25 <sup>1</sup>Department of Perioperative Medicine, CHU Clermont-Ferrand, Clermont-Ferrand, France  
26

27 <sup>2</sup>Department of Clinical Research and Innovation (DRCI), CHU Clermont-Ferrand,  
28 Clermont-Ferrand, France  
29

30 <sup>3</sup>Department of Medical Biochemistry and Molecular Biology, CHU Clermont-Ferrand,  
31 Clermont-Ferrand, France  
32

33 <sup>4</sup>Clermont Université, Université d'Auvergne, EA 7281, R2D2, Clermont-Ferrand, France  
34

35 <sup>5</sup>Department of Pharmacy, CHU Clermont-Ferrand, Clermont-Ferrand, France  
36

37 <sup>6</sup>Clermont Université, Université d'Auvergne, EA 4676C-BIOSENS, Clermont-Ferrand,  
38 France  
39

40 <sup>7</sup>Department of Surgery, Geneva university hospitals, Geneva, Switzerland  
41

42 <sup>8</sup>Division of Intensive Care, Geneva university hospitals, Geneva, Switzerland  
43

44 <sup>9</sup>Department of Anesthesiology and Critical Care Medicine B (DAR B), Saint-Eloi teaching  
45 hospital, Montpellier university hospital, INSERM U-1046, Montpellier, France  
46

47 <sup>10</sup>Division of Anesthesiology, Critical Care, Pain and Emergency Medicine, Nîmes university  
48 hospital and EA 2992, Université Montpellier, Nîmes, France  
49  
50  
51  
52  
53  
54  
55  
56  
57

1  
2  
3 <sup>11</sup>Intensive Care Unit, Cannes general hospital, Cannes, France  
4

5 <sup>12</sup>Department of Critical Care Medicine, Saint Luc university hospital, Université Catholique  
6  
7 de Louvain, Brussels, Belgium  
8

9 <sup>13</sup>Department of Anesthesiology and Intensive Care Medicine, Nancy university hospital,  
10  
11 Nancy, France  
12

13 <sup>14</sup>Anesthesia and Surgical Intensive Care, Nice Archet 2 university hospital and INSERM  
14  
15 U1065, team 8, Nice, France  
16

17 <sup>15</sup>Intensive Care Unit, Annecy Genevois general hospital, Annecy, France  
18

19 <sup>16</sup>Department of Anesthesiology and Critical Care Medicine, Emile-Roux general hospital, Le  
20  
21 Puy-en-Velay, France  
22  
23  
24  
25  
26  
27  
28

29 Corresponding author and address for reprints:  
30

31 Matthieu Jabaudon, M.D., Ph.D.  
32

33 Department of Perioperative Medicine, University Hospital of Clermont-Ferrand  
34  
35 Clermont Université, Université d'Auvergne, EA 7281, R2D2, Clermont-Ferrand, France  
36  
37 CHU Clermont-Ferrand, 1 Place Lucie Aubrac, 63003 Clermont-Ferrand Cedex 1, France  
38  
39 (Tel) +33 473 750 501 (Fax) +33 473 750 500 (Mail) [mjabaudon@chu-clermontferrand.fr](mailto:mjabaudon@chu-clermontferrand.fr)  
40  
41

42 Name and contact information for the trial sponsor:  
43

44 M. Patrick Lacarin  
45

46 Department of Clinical Research and Innovation (DRCI)  
47  
48 CHU Clermont-Ferrand, 58, Rue Montalembert, 63003 Clermont-Ferrand Cedex 1, France  
49  
50 (Tel) +33 473 751 195 (Mail) [placarin@chu-clermontferrand.fr](mailto:placarin@chu-clermontferrand.fr)  
51  
52  
53  
54

55 Word count: 5092  
56  
57  
58  
59  
60

## ARTICLE FOCUS

Acute pancreatitis (AP) is a major gastrointestinal disease that is associated with high mortality rates in its most severe forms. Recent preclinical and clinical data suggest that epidural analgesia (EA), a technique primarily aimed at decreasing pain, might improve clinical outcome through anti-inflammatory effects or enhanced splanchnic and pancreatic blood flow.

We therefore designed a prospective multicentre randomised controlled trial to study the impact of EA on patient outcome after AP, as assessed by ventilator-free days at day 30, serving as a composite surrogate for death, respiratory failure requiring invasive mechanical ventilation and duration of invasive mechanical ventilation when needed.

## KEY MESSAGES

To our knowledge, this large ongoing prospective multicentre randomised controlled trial is the first trial aimed at assessing the effects of EA on major clinical outcomes in critically ill patients with AP.

## STRENGTHS AND LIMITATIONS OF THIS STUDY

This is the first randomised controlled trial to investigate the effects of EA on organ failure, mortality and clinical outcomes in critically ill patients with AP enrolled in a total of 11 French, Belgian and Swiss intensive care units.

Other strengths are the inclusions performed around the clock, nights and weekend included as a routine clinical practice.

In addition, our study includes the constitution of a biobank of plasma and urine sampled over the first week after inclusion, in order to assess the effects of EA on biological markers of inflammation, lung injury and renal failure.

1  
2  
3 One limitation of the study is that the physicians are aware of the group of inclusion.  
4  
5 However, assessors of study outcomes and biological measures are independent observers  
6  
7 who do not know the group of inclusion.  
8

9  
10 Another limitation may include poor generalisability of results from this study to  
11  
12 unexperienced centres, because EA is a technique that is restricted to experienced  
13  
14 anaesthesiologists and intensivists.  
15

16 Finally, some could highlight potential risks associated with EA in critically ill  
17  
18 patients with hyperinflammatory conditions such as AP, although previous studies have  
19  
20 reported good feasibility and safety of EA in this setting. This trial will provide additional  
21  
22 data on the safety of EA in ICU patients.  
23  
24  
25  
26  
27  
28  
29  
30  
31  
32  
33  
34  
35  
36  
37  
38  
39  
40  
41  
42  
43  
44  
45  
46  
47  
48  
49  
50  
51  
52  
53  
54  
55  
56  
57  
58  
59  
60

## ABSTRACT

**Introduction:** Acute pancreatitis (AP) is associated with high morbidity and mortality in its most severe forms. Most patients with severe AP require intubation and invasive mechanical ventilation, frequently for more than 7 days, which is associated with worst outcome. Recent increasing evidence from preclinical and clinical studies support beneficial effects of epidural analgesia (EA) in AP, such as increased gut barrier function and splanchnic, pancreatic, renal perfusion, decreased liver damage and inflammatory response, and reduced mortality. Because recent studies suggest that EA might be a safe procedure in the critically ill, we sought to determine whether EA reduced AP-associated respiratory failure and other major clinical outcomes in patients with AP.

**Methods and analysis:** The Epidural Analgesia for Pancreatitis (EPIPAN) trial is an investigator-initiated prospective multicentre randomised controlled two-arm trial with assessor-blinded outcome assessment. The EPIPAN trial randomises 148 patients with AP requiring admission to an intensive care unit (ICU) to receive EA (with patient-controlled epidural administration of ropivacaine and sufentanil) combined with standard care based on current recommendations on the treatment of AP (interventional group), or standard care alone (reference group). The primary outcome is the number of ventilator-free days at day 30. Secondary outcomes include main complications of AP (e.g., organ failure and mortality, among others), levels of biological markers of systemic inflammation, epithelial lung injury, renal failure, and healthcare-associated costs.

**Ethics and dissemination:** The study was approved by the appropriate ethics committee (*CPP Sud-Est VI*). Informed consent is required. If combined application of EA and standard care proves superior to standard care alone in patients with AP in the ICU, the use of EA may become standard practice in experienced centres, thereby decreasing potential complications

1  
2  
3  
4  
5  
6  
7  
8  
9  
10  
11  
12  
13  
14  
15  
16  
17  
18  
19  
20  
21  
22  
23  
24  
25  
26  
27  
28  
29  
30  
31  
32  
33  
34  
35  
36  
37  
38  
39  
40  
41  
42  
43  
44  
45  
46  
47  
48  
49  
50  
51  
52  
53  
54  
55  
56  
57  
58  
59  
60

related to AP and its burden in critically ill patients. The results will be disseminated in a peer-reviewed journal.

**Trial registration number:** NCT02126332.

(Abstract word count: 300)

For peer review only



## INTRODUCTION

### Background and rationale

This manuscript was written in accordance with the SPIRIT guidelines (supporting file in the appendix).[1]

Acute pancreatitis (AP) is one of the most frequent gastrointestinal diseases, whose incidence in the US reaches 35 per 100,000 population annually. In 2009, AP was responsible for 275,000 hospital admissions in the USA, with a total cost of over US \$2,5 billion.[2,3]. AP develops when intracellular protective mechanisms to prevent trypsinogen activation or reduce trypsin activity are overwhelmed[4]. The initiating event may be any insult to the acinar cell that impairs the secretion of zymogen granules, such as alcohol abuse or gallstone migration into the common bile duct. Once the process of cellular injury is initiated, cellular membrane trafficking becomes chaotic, leading to the release of proinflammatory mediators (tumour necrosis factor (TNF)- $\alpha$ , interleukin (IL)-6, and IL-8). These mediators participate to an increase in pancreatic vascular permeability that subsequently favours hemorrhage, oedema and eventually pancreatic necrosis. As these mediators are excreted into the circulation, systemic complications can arise, such as bacteraemia due to gut flora translocation, acute respiratory distress syndrome (ARDS)[5], pleural effusions, gastrointestinal hemorrhage and renal failure.[4,6–9]

The revised Atlanta classification addresses the clinical course and severity of the disease.[10] AP may be divided into two forms, interstitial oedematous pancreatitis, during the first week, and necrotising pancreatitis during a later phase (after 7 days). In approximately 80% of patients, the severity of AP is rather mild and resolves without serious morbidity. However, in up to 20% of patients, AP presents in a more severe form requiring admission to the intensive care unit (ICU) due to persistent organ failure.[10,11] Mortality

1  
2  
3 rate can reach 20-40% in severe AP because of multiorgan failure (MOF) and pancreatic  
4 necrosis.[2,12]  
5  
6

7 The amplifying effects of inflammatory and oxidative impairment often lead to severe  
8 AP-induced complications, which are often regarded as hallmarks of severe AP and herald  
9 poor outcome. In a recent French observational study of ICU patients with severe AP, 58% of  
10 patients developed acute respiratory failure requiring intubation and invasive mechanical  
11 ventilation (MV) (mean duration 15 days, standard deviation (SD) 17 days), and such patients  
12 had higher mortality rates than those who were not intubated (34% vs 1.4%).[12] Since  
13 respiratory failure is the main cause of death in patients with severe AP, more work is needed  
14 for us to prevent and treat AP-associated respiratory failure. Despite recent substantial  
15 improvements in the multidisciplinary management of AP (e.g., with regards to fluid therapy,  
16 intensive care management, prevention of infectious complications, nutritional support,  
17 biliary tract management or necrotising pancreatitis management), the prognosis of severe AP  
18 remains poor in patients who develop acute respiratory failure requiring intubation and  
19 invasive respiratory support.[4,10,13] Of notes, available therapeutic approaches do not have  
20 a direct action on the pancreas itself but aim to attenuate the process of MOF present in the  
21 severe form of AP, and no causal treatment has been developed yet.  
22  
23  
24  
25  
26  
27  
28  
29  
30  
31  
32  
33  
34  
35  
36  
37  
38  
39

40 Epidural analgesia (EA) is one of the most widely utilized neural deafferentation  
41 technique. It is used for analgesia during the perioperative period, but also for obstetrics  
42 labour and trauma as well as in the treatment of acute, chronic and cancer-related  
43 pain.[14,15] Its objective is not only to block noxious afferent stimuli, but also to induce  
44 bilateral selective thoracic sympathetic blockade. In addition to analgesia itself, modulatory  
45 effects of thoracic EA could improve organ perfusion with reduced complications in the  
46 perioperative period, thus possibly decreasing postoperative complications, shortening  
47 hospital stay and improving survival.[15–17]  
48  
49  
50  
51  
52  
53  
54  
55  
56  
57  
58  
59  
60

1  
2  
3 EA has not yet been extensively assessed in the ICU setting in general, and in  
4 critically ill patients with severe AP in particular. Several studies suggest that thoracic EA  
5 might be a safe procedure in centres comprising anaesthesiologists with expertise in EA, and  
6 thoracic EA has already been used for years to treat pain during AP in critically ill patients in  
7 some centres.[18–20] In addition, recent animal studies suggest that thoracic EA may  
8 decrease the severity of AP, with reduced respiratory, thromboembolic and abdominal  
9 complications.[21–23] EA further decreased the severity of metabolic acidosis and tissue  
10 injury in animals, thus preventing the progression from oedematous to necrotising AP.[24]  
11 EA may also restore pancreatic hypoperfusion induced by AP through blood flow  
12 redistribution from splanchnic to non-perfused pancreatic regions,[25,26] and a recent  
13 clinical study suggests that EA could increase pancreatic arterial perfusion and improve  
14 clinical outcome in patients with AP.[20] Findings from other experimental studies also  
15 support beneficial effects of EA in severe AP, such as increased gut barrier function and renal  
16 perfusion, decreased liver damage and inflammatory response, and reduced  
17 mortality.[23,25,27,28]

18  
19  
20  
21  
22  
23  
24  
25  
26  
27  
28  
29  
30  
31  
32  
33  
34  
35  
36  
37  
38  
39  
40  
41  
42  
43  
44  
45  
46  
47  
48  
49  
50  
51  
52  
53  
54  
55  
56  
57  
58  
59  
60  
Despite such promising findings from preclinical studies, the effects of thoracic EA  
on major clinical outcomes have never been specifically assessed and its benefit in critically  
ill patients with AP remains uncertain.

## Objectives

### *Primary objective*

To determine whether the use of thoracic EA combined to standard care is more  
effective at increasing ventilator-free days (VFD) at day 30 over standard care alone in  
critically ill patients with AP. The goal of the EPIPAN trial is therefore to test the impact of

1  
2  
3 thoracic EA on respiratory failure, with the hypothesis that EA could influence survival  
4  
5 and/or the need for invasive MV and/or its duration when invasive MV is required.  
6  
7

### 8 9 ***Secondary objectives***

10  
11 To determine whether in comparison to standard care alone, application of thoracic  
12  
13 EA combined with standard care could improve survival, decrease major complications of  
14  
15 AP (including sepsis, organ failure), AP-related costs, the need for medical, surgical and  
16  
17 radiological interventions, and impact biological markers of systemic inflammation, lung  
18  
19 injury and renal failure.  
20  
21

### 22 23 24 25 **Trial design**

26  
27 The Epidural Analgesia for Pancreatitis (EPIPAN) trial is an investigator-initiated,  
28  
29 open-labelled, multicentre randomised controlled two-arm trial.  
30  
31

### 32 33 34 **CONSORT diagram**

35  
36 Figure 1 shows the CONSORT diagram of the EPIPAN trial.  
37  
38  
39  
40  
41

## 42 **METHODS: PARTICIPANTS, INTERVENTIONS AND OUTCOMES**

### 43 44 45 46 **Study setting**

47  
48 The EPIPAN study is undergoing in a total of 11 mixed medical and surgical ICUs in  
49  
50 France (Clermont-Ferrand (2 ICUs), Montpellier, Nîmes, Cannes, Nancy, Nice, Annecy, Le-  
51  
52 Puy-en-Velay), Belgium (Brussels) and Switzerland (Geneva).  
53  
54  
55  
56  
57  
58  
59  
60

## Eligibility criteria

### *Inclusion criteria*

Patients must be admitted to the ICU for AP, whatever the precise reason for admission (e.g., pain management, organ failure).

### *Exclusion criteria*

Patients fulfilling one or more of the following criteria are not included: age <18 years, pregnant or breastfeeding woman, protected person, known or suspected hypersensitivity to study drugs (ropivacaine and sufentanil are administered via the epidural catheter in the EA group, and epidural clonidine can be used as an iterative rescue treatment to achieve analgesia goals), and absolute contraindications to the placement of an epidural catheter: prothrombin time < 60 %, platelet count < 75 G/L<sup>-1</sup>, curative anticoagulation unless it can be interrupted for at least 8 hours, local infection, active infection of the central nervous system, suspected or confirmed intracranial hypertension, history of back surgery including a dural space procedure, refractory circulatory shock despite adequate resuscitation.

### **Interventions**

Patients eligible for inclusion will be randomly assigned to the interventional group (EA combined with standard care) or to the reference group (standard care alone). Because the trial was primarily designed as a pragmatic trial, all patients will be managed by attending physicians as recommended in recent consensual guidelines on the management of severe AP (standard care): early enteral nutrition when possible, resuscitation measures to correct hypovolemia, maintenance of electrolyte balance, correction of acidosis, early diagnosis and supportive treatment of complications.[10,13,29–31] In particular, criteria for intubation are based on current recommendations and include any of the following major clinical events:

1  
2  
3 respiratory or cardiac arrest, respiratory pauses with loss of consciousness or gasping for air,  
4  
5 massive aspiration, persistent inability to clear respiratory secretions, heart rate of less than  
6  
7 50/min with loss of alertness, and severe hemodynamic instability without response to fluid  
8  
9 and vasoactive drugs. When invasive mechanical ventilation is needed, the use of a low-tidal-  
10  
11 volume protective ventilatory strategy and recommendations on weaning from mechanical  
12  
13 ventilation are strongly encouraged at each participating centre.[32,33] Analgesia goals are  
14  
15 the same in both groups, with regular evaluation of pain, at least every 4 hours. In conscious  
16  
17 and communicating patients, a visual analogue score (VAS) for pain below 40/100 is targeted  
18  
19 and a behavioural pain scale (BPS) of 3-4 is targeted in non-communicating patients.[34,35]  
20  
21 In both groups, a stepped multimodal approach to pain management will be applied based on  
22  
23 routine protocols from each participating centre, and combining opioid, non-opioid +/-  
24  
25 adjuvant drugs administered through the oral, enteral and/or intravenous routes, as  
26  
27 recommended by the World Health Organization's pain relief ladder.[13,36]  
28  
29  
30  
31

32 The interventional group consists in applying standard care combined with thoracic  
33  
34 EA through an epidural catheter placed in an intervertebral space between the 6<sup>th</sup> and the 9<sup>th</sup>  
35  
36 thoracic vertebra, and administration of a mixed solution of ropivacaine (2 mg.mL<sup>-1</sup>) and  
37  
38 sufentanil (0.5 µg.mL<sup>-1</sup>), for at least 72 hours. In the study protocol, there is no strict time  
39  
40 interval between ICU admission, enrolment in the study and placement of the epidural  
41  
42 catheter. EA will be provided using a patient-controlled epidural analgesia (PCEA) device,  
43  
44 with continuous infusion rate of 5 to 15 mL.h<sup>-1</sup> and *bolus* of 3 to 10 mL every 10 minutes  
45  
46 maximum. If the patient is not able to self-administer EA, nurses are encouraged to  
47  
48 administer *boli* to achieve analgesia goals if necessary, e.g. prior to possibly painful nursing  
49  
50 procedures. In addition, iterative epidural administrations of clonidine (1 µg.kg<sup>-1</sup>) may be  
51  
52 used by attending physicians to achieve analgesia goals.[37] The drugs used during EA in  
53  
54  
55  
56  
57  
58  
59  
60

1  
2  
3 this trial will be provided in an unblinded manner by the department of Pharmacy at  
4  
5 Clermont-Ferrand university hospital to all participating centres.  
6

7  
8 Because of insufficient evidence regarding the optimal duration of EA in ICU  
9  
10 patients,[18,19,38] total duration of EA will be chosen by participating physicians for each  
11  
12 patient, given that it has been administered for at least 72 hours. Weaning of EA and removal  
13  
14 of epidural catheter will be conducted accordingly to recommendations and routine protocols  
15  
16 from each participating centre.  
17  
18

## 19 20 21 **Outcomes**

### 22 *Primary outcome measures*

23  
24  
25 The primary outcome variable is the number of VFD at day 30, defined as the number  
26  
27 of days from day 0 (inclusion) to day 30 after inclusion on which a patient is able to breathe  
28  
29 without invasive assistance. A difference in VFD can reflect a difference in mortality,  
30  
31 ventilator days, or both.  
32  
33

### 34 35 36 *Secondary outcome measures*

37  
38 Secondary outcomes are the need for and duration of invasive and/or noninvasive MV  
39  
40 at day 30, the incidence of AP-related complications at day 30 (death, organ failure, severe  
41  
42 sepsis, septic shock,[32] ARDS,[5] acute respiratory failure, abdominal compartment  
43  
44 syndrome, intra- or extra-abdominal sepsis, pancreatic necrosis or abscess (infected or not),  
45  
46 hemodynamic failure requiring vasopressor therapy, acute kidney injury,[39] requirement for  
47  
48 renal replacement therapy, infected intra-abdominal abscesses requiring drainage  
49  
50 (radiological, endoscopic or surgical), intolerance to enteral feeding), analgesia scores (VAS,  
51  
52 BPS), need for sedation (drugs, doses, level of sedation using the Richmond Agitation-  
53  
54 Sedation Scale)[40,41], lengths of stay in ICU and in hospital, the need for ICU readmission  
55  
56  
57

1  
2  
3 within 30 days after inclusion, levels on days 0, 2 and 7 after inclusion of biological markers  
4  
5 (as assessed in *duplicate* using commercially available kits) of systemic inflammation  
6  
7 (plasma levels of IL-6)[42], lung epithelial injury (plasma levels of the soluble form of the  
8  
9 receptor for advanced glycation end-products, sRAGE)[43,44] and acute kidney injury  
10  
11 (plasma levels of neutrophil gelatinase-associated lipocalin, NGAL,[45,46], urine levels of  
12  
13 tissue inhibitor of metalloproteinase 2 (TIMP-2) and insulin-like growth factor binding  
14  
15 protein7 (IGFBP-7)[47]), and healthcare-related costs at day 30. The need for antibiotic or  
16  
17 antifungal therapy will be assessed. Any minor or major complication (e.g., epidural  
18  
19 hematoma or infection) that could be attributable to EA and/or epidural catheter will also be  
20  
21 rigorously documented.  
22  
23  
24  
25  
26

### 27 **Participant timeline**

28  
29 The participant timeline is described in table 1.  
30  
31  
32

### 33 **Recruitment**

34  
35 Patients are expected to be included during a 3-year inclusion period that has begun in  
36  
37 June 2014. This duration was estimated based on the number of admissions for AP at each  
38  
39 participating centre during a 5-year period (2009-2014).  
40  
41

42 2013-2014: Protocol, approvals from the ethics committee (*CPP Sud-Est VI*) and the French  
43  
44 Medicine agency (*Agence Nationale de Sécurité du Médicament, ANSM*); trial tool  
45  
46 development (case report form, randomisation system).  
47  
48

49 2014-2017: Inclusion of patients.  
50

51 2017: Cleaning and closure of the database. Data analyses, writing of the manuscript and  
52  
53 submission for publication.  
54  
55  
56  
57  
58  
59  
60



1  
2  
3 A prolongation of the inclusion period will be requested if needed based on observed  
4  
5 inclusion rate.  
6  
7  
8  
9

## 10 11 **METHODS: ASSIGNMENT OF INTERVENTIONS** 12

### 13 14 15 **Allocation and sequence generation** 16

17  
18 An electronic, centralised web-based data management system will be used for  
19  
20 randomisation (TENALEA, FormsVision BV, the Netherlands). To minimise selection bias,  
21  
22 randomisation will be performed in strict sequence, that is, when a subject is confirmed as  
23  
24 eligible for randomisation, the next unassigned randomisation number in sequence will be  
25  
26 given by the TENALEA system. Randomisation will be stratified and minimised based on the  
27  
28 recruiting centre, the duration of symptoms (either above or below 48 hours from first  
29  
30 symptoms, e.g. abdominal pain, to inclusion) and severity of AP as assessed by the modified  
31  
32 Marshall scoring system for organ dysfunction.[10,48] This scoring system has the merit of  
33  
34 simplicity, universal applicability across international centres, and the ability to stratify  
35  
36 disease severity easily and objectively based on respiratory, renal and/or hemodynamic  
37  
38 failure.[49] A score of 2 or more usually defines the presence of organ failure, and 3 strata of  
39  
40 severity (scores equal to 0, 1-2 or 3-4) are used to stratify randomisation on the degree of  
41  
42 organ failure in the EPIPAN trial.  
43  
44  
45  
46  
47  
48

### 49 **Blinding** 50

51 This is an open-label, unblinded trial for patients and physicians in charge of the  
52  
53 patients, because of the nature itself of the intervention (placement and maintenance of EA  
54  
55 through an epidural catheter). Although some systems may be proposed to ensure, at least,  
56  
57  
58  
59  
60

1  
2  
3 partial blinding to the patient when EA is assessed,[50] such systems were not included in the  
4  
5 trial design in order to ensure better feasibility among multiple centres. However, assessors of  
6  
7 clinical and biological data in charge of statistical analyses and outcome assessment will be  
8  
9 masked as to the subjects' assigned group.  
10

## 11 12 13 14 15 16 **METHODS: DATA COLLECTION, MANAGEMENT AND ANALYSIS** 17

### 18 19 20 **Data collection and management** 21

22 Study data are prospectively collected and managed by trained research coordinators  
23 and/or investigators from each participating centre, using REDCap electronic data capture  
24 tools hosted at Clermont-Ferrand university hospital.[51] REDCap (Research Electronic Data  
25 Capture) is a secure, web-based application designed to support data capture for research  
26 studies, providing: 1) an intuitive interface for validated data entry; 2) audit trails for tracking  
27 data manipulation and export procedures; 3) automated export procedures for seamless data  
28 downloads to common statistical packages; and 4) procedures for importing data from  
29 external sources.  
30  
31  
32  
33  
34  
35  
36  
37  
38  
39

40 The following data are collected and registered at ICU admission and upon inclusion:  
41 baseline demographics and characteristics (age, sex, weight, height, body temperature, delay  
42 between the onset of AP and ICU admission/study inclusion, comorbidities and coexisting  
43 conditions), baseline severity of illness (modified Marshall scoring system, Simplified Acute  
44 Physiologic Score (SAPS) II, Sequential Organ Failure Assessment (SOFA)), usual clinical  
45 and biological variables that are measured in critically ill patients, organ failure and  
46 treatments. From inclusion to day 30 will be assessed: survival status, main complications of  
47 AP (e.g., organ failure, sepsis), the need for therapeutic interventions (such as surgery or  
48  
49  
50  
51  
52  
53  
54  
55  
56  
57

1  
2  
3 endoscopic manoeuvres, MV (either invasive or noninvasive), vasopressor support,  
4  
5 continuous renal replacement therapy and/or antibiotic therapy), duration of MV if required,  
6  
7 length of stay in the ICU/hospital. Biological samples will be collected in each participating  
8  
9 centre, prior to shipment of all samples to the department of Medical Biochemistry and  
10  
11 Molecular Biology at Clermont-Ferrand university hospital for blinded measurements.  
12  
13

## 14 15 16 **Statistical methods**

### 17 18 *Sample size Estimation*

19  
20 According to previous studies from the literature,[12] we have estimated that a sample  
21  
22 size of  $n = 74$  patients per group would provide 80% statistical power to detect an absolute  
23  
24 between-group difference of 7 days (with a SD of  $\pm 15$ ) in the primary outcome, i.e. in the  
25  
26 number of VFD at day 30 after randomization (expected number of VFD at day 30:  $20 \pm 15$   
27  
28 vs.  $13 \pm 15$ ), for a two-sided type I error of 5%.  
29  
30

31  
32 Given theoretical concerns related to possible adverse effects of EA in ICU patients,  
33  
34 an interim safety analysis will be performed after data for 74 patients are collected. The  
35  
36 independent Data and Safety Monitoring Board (DSMB) will recommend that the trial be  
37  
38 stopped if it is found that the conduct of the trial compromises patient safety (a between-  
39  
40 group difference in mortality or VFD at day 30).  
41  
42

### 43 44 45 *Statistical analysis*

46  
47 A predefined statistical analysis plan will be followed. Statistical analyses will be  
48  
49 conducted using Stata software (version 14, StataCorp, College Station, USA). A two-sided  
50  
51 p-value of less than 0.05 will be considered to indicate statistical significance.  
52

53  
54 Concerning the primary outcome, the comparison between interventional and  
55  
56 reference groups will be analysed using Student's t-test or Mann-Whitney's test if  
57

1  
2  
3 assumptions of t-test are not met. Normality will be studied by the Shapiro-Wilk test and  
4  
5 homoscedasticity using the Fisher-Snedecor test. Results will be expressed as effect-sizes and  
6  
7 95% confidence intervals. Intention to treat (ITT) analysis of data from all randomised  
8  
9 patients (except patients who withdraw their consent and those who do not meet the inclusion  
10  
11 criteria), including those from the interventional group who do not receive EA for at least 72  
12  
13 hours, will be considered for the primary analysis. Then, the analysis of the primary outcome  
14  
15 will be completed by multivariate analysis using a linear mixed model to take into account:  
16  
17 (1) fixed effects covariates determined according to univariate results and to clinical  
18  
19 relevance (duration of symptoms (either above or below 48 hours from first symptoms, e.g.  
20  
21 abdominal pain, to inclusion) and severity of AP as assessed by the modified Marshall  
22  
23 scoring system for organ dysfunction) and (2) centre as random-effects (to measure between  
24  
25 and within centre variability). The normality of residuals will be studied as described  
26  
27 previously. Results will be expressed as regression coefficients and 95% confidence intervals.  
28  
29 Other continuous endpoints (e.g., level of sedation using the Richmond Agitation-Sedation  
30  
31 Scale, analgesia scores, doses of drugs, length of stay in ICU/hospital, levels and kinetics of  
32  
33 biological markers, duration of MV, and healthcare-related costs at day 30) will be analysed  
34  
35 in the same way.  
36  
37  
38  
39

40  
41 Categorical parameters (death, organ failure, severe sepsis, septic shock, ARDS, the  
42  
43 need for MV, acute respiratory failure, abdominal compartment syndrome, intra- or extra-  
44  
45 abdominal sepsis, pancreas necrosis (infected or not) as assessed by computed tomography,  
46  
47 hemodynamic failure requiring vasopressor support, acute kidney injury, the need for renal  
48  
49 replacement therapy, intra-abdominal collection requiring radiological, surgical or  
50  
51 endoscopic drainage) will be analysed using Chi-squared or Fisher's exact tests for univariate  
52  
53 analysis and generalized linear mixed model (logistic for dichotomous dependent endpoint or  
54  
55 Poisson if more appropriate) for multivariate analysis. Type I error will be adjusted using the  
56  
57

1  
2  
3 Hochberg method if appropriate. Results will be expressed as relative risks and 95%  
4  
5 confidence intervals. These data will also be analysed as censored data, when appropriate;  
6  
7 survival analyses will be performed with the Kaplan-Meier estimator and differences between  
8  
9 groups will then be assessed using the log-rank test. The assumption of log-linearity of risk  
10  
11 and the proportional hazards will be checked beforehand. Results will be expressed as hazard  
12  
13 ratios and 95% confidence intervals. The tolerance of enteral nutrition and/or the incidence of  
14  
15 signs of gastrointestinal intolerance (nausea, vomiting, and ileus) will be analysed similarly.  
16  
17

18  
19 Longitudinal analyses of repeated measures (levels on days 0, 2 and 7 after inclusion  
20  
21 of biological markers of systemic inflammation, lung epithelial injury and acute kidney injury  
22  
23 will be studied using random-effect models (linear or generalized linear), to take into account  
24  
25 patients as random-effect (slope and intercept), nested in centre random-effect.  
26  
27

28  
29 According to clinical relevance and to CONSORT recommendations, subgroup  
30  
31 analyses depending on the presence or the absence of epidural analgesia will be proposed  
32  
33 after the study of subgroup x randomisation group interaction in regression models.  
34

35  
36 Per-protocol analyses will also be conducted after intention-to-treat analysis is  
37  
38 performed. Results from per-protocol analyses will be compared to those from intention-to-  
39  
40 treat analyses. A particular focus will be given to safety and patients who are lost to follow-  
41  
42 up. A sensitivity analysis will be performed and the nature of missing data will be studied  
43  
44 (missing at random or not). According to this study, the most appropriate approach to the  
45  
46 imputation of missing data will be proposed (maximum bias (e.g., last observation carried  
47  
48 forward vs. baseline observation carried forward) or estimation proposed by Verbeke and  
49  
50 Molenberghs for repeated data).  
51

## 52 53 54 55 56 **METHODS: MONITORING**

### Data monitoring

Before the start of patient recruitment, all physicians and other healthcare workers in the ICU attended formal training sessions on the study protocol and data collection.

The physicians, clinical research nurses and/or clinical research assistants are in charge of daily patient screening and inclusion, ensuring compliance with the study protocol and collecting the study data. Patients who are admitted to the ICU with AP but who are not included, and the reasons why they are not included, will be recorded anonymously into a screening log in each centre.

Data monitoring and quality control will be conducted at least annually in all participating centres by official representatives from the study promoter, i.e. from the department of Clinical Research and Innovation at Clermont-Ferrand university hospital.

### Harms

The trial may be temporarily stopped for an individual patient, at the discretion of the attending physician, in case of major serious adverse events suspected to be associated with EA.

Given potential theoretical concerns related to possible adverse effects of EA in ICU patients, an interim safety analysis will be performed after data for 74 patients have been obtained using the Lan and DeMets method (East software, Cytel Inc., Cambridge, MA, USA). The independent Data and Safety Monitoring Board (DSMB) will recommend that the trial be stopped if it is found that the conduct of the trial compromises patient safety (a between-group difference in mortality or VFD at day 30).

All adverse events thought to be related to the trial will be reported to the trial coordinating centre. According to the French Public Health Code, all suspected unexpected

1  
2  
3 serious adverse events will be reported to the ANSM. In addition, this information will be  
4  
5 submitted to the DSMB.  
6  
7

### 8 9 **Auditing**

10  
11 An independent DSMB, composed of three experts (Prs. Hervé Dupont, Thomas  
12 Lescot and Philippe Montravers) will monitor the safety of the trial. The DSMB will be  
13 responsible for safeguarding the interests of trial participants, assessing the safety and  
14 efficacy of the interventions during the trial, and for monitoring the overall conduct of the  
15 clinical trial. To contribute to enhancing the integrity of the trial, the DSMB may also  
16 formulate recommendations relating to the recruitment/retention of participants, their  
17 management, improving adherence to protocol-specified regimens and retention of  
18 participants, and the procedures for data management and quality control.  
19  
20  
21  
22  
23  
24  
25  
26  
27  
28  
29  
30  
31  
32

## 33 **ETHICS AND DISSEMINATION**

### 34 35 36 37 **Research ethics approval**

38  
39 The EPIPAN study is conducted in accordance with the declaration of Helsinki and  
40 was registered at <http://www.clinicaltrial.gov> on April 11, 2014 with trial identification  
41 number NCT02126332. The trial was approved by the ethics committee *CPP Sud-Est VI* in  
42 June, 2014 (approval number AU1090) and ANSM (approval number 131557A-32) in  
43 January, 2014. Approvals from appropriate authorities were also obtained for Belgian and  
44 Swiss centres. Any change to eligibility criteria, outcomes, analyses will be communicated to  
45 investigators, the ethics committee and the ANSM to obtain their approval.  
46  
47  
48  
49  
50  
51  
52  
53  
54  
55  
56  
57  
58  
59  
60

### **Consent or assent**

Three methods of consent will be used, as required by the Institutional Review Board in accordance with the 2013 Declaration of Helsinki. Whenever possible, the patient will be included after written informed consent. However, the patient may be unable to provide informed consent because of the severity of illness (e.g., altered mental status, use of sedation). These patients will be included after written informed consent is provided by the next of kin, or using an emergency procedure (investigator signature, countersigned by an independent physician) if the next of kin is not present. When available, and as soon as possible after recovery, patients will be retrospectively asked for written consent to continue the trial.

### **Confidentiality**

Data will be handled in a confidential and anonymous manner, according to French law. All original records will be archived at trial sites for 15 years. The clean database file will be anonymised and kept for 15 years.

### **Declaration of interest**

The study is an investigator-initiated trial. Study promotion is performed by Clermont-Ferrand university hospital, Clermont-Ferrand, France. There is no industry support or involvement in the trial. The principal investigators have no financial or other competing interests.

### **Funding**

This trial is supported by grants from the *Société Française d'Anesthésie et de Réanimation (Contrat de Recherche SFAR 2015)* and from Clermont-Ferrand university



1  
2  
3 hospital (*Appel d'Offre Interne* 2014, CHU Clermont-Ferrand). The funders have no  
4  
5 influence in the study design, conduct, and analysis or in the preparation of this article.  
6  
7

### 8 9 **Dissemination policy**

10  
11 Findings will be published in peer-reviewed journals and presented at local, national  
12  
13 and international meetings and conferences to publicise and explain the research to clinicians,  
14  
15 commissioners and service users. All investigators will have access to the final data set.  
16  
17 Participant-level data sets will be made accessible on a controlled access basis.  
18  
19

### 20 21 22 23 24 **DISCUSSION**

25  
26  
27  
28 Severe acute pancreatitis requiring ICU admission is associated with high morbidity  
29  
30 and mortality, especially in patients who need intubation and invasive ventilation.[10,12]  
31  
32 Optimising the management of critically ill patients with AP is therefore of particular  
33  
34 importance, especially in those with, or at risk of, acute respiratory failure requiring  
35  
36 intubation/prolonged ventilation, death, or both. However, and despite recent improvement in  
37  
38 ICU practice in general, current guidelines on the management of severe AP only include  
39  
40 supportive measures such as early enteral nutrition, hemodynamic resuscitation, maintenance  
41  
42 of electrolyte balance, correction of acidosis, and early diagnosis and treatment of  
43  
44 complications (e.g., with appropriate use of anti-infectious drugs, radiologic drainage,  
45  
46 endoscopic manoeuvres and/or elective surgery in selected patients).[10,13,29–31]  
47  
48  
49

50  
51 EA is primarily an analgesic technique that is used by anaesthesiologists to treat pain  
52  
53 in the perioperative period, for obstetrical analgesia and after severe chest trauma.[52] There  
54  
55 has been recent interest in the use EA as a therapy for AP, and growing evidence from  
56  
57

1  
2  
3 experimental studies now support beneficial effects of EA that include augmented ileal  
4 mucosal capillary perfusion, restored pancreatic microcirculation, increased gut barrier  
5 function and renal perfusion, decreased severity and improved survival.[21–23,25,27,28,53].  
6  
7  
8  
9  
10 However, only one small recent randomised pilot study in 35 patients with AP was found to  
11 translate such promising preclinical findings into the clinical settings.[20] In this study, the  
12 median duration of EA was 5.7 days, and no complications of the epidural procedure were  
13 reported; an improvement in perfusion of the pancreas was observed in 43% of measurements  
14 in the EA group versus 7% in the control group ( $P=0.0025$ ), but although analgesia was better  
15 when EA was used, there was no significant between-group differences in other clinical  
16 outcomes (e.g., the need for necrosectomy, length of stay in hospital and mortality), probably  
17 due to a lack of statistical power.[20] The EPIPAN trial is the first randomised controlled  
18 study powered to investigate the effectiveness of thoracic EA combined with standard care on  
19 major clinical outcomes in critically ill patients with EA, with specific emphasis on  
20 respiratory outcomes and survival.[21]

21  
22  
23  
24  
25  
26  
27  
28  
29  
30  
31  
32  
33  
34 This study may have some limitations. First, no strict definition for severe AP is used  
35 to enrol patients. Instead, all patients admitted to the ICU with AP is eligible whatever the  
36 precise reason for admission (e.g., pain management, development of organ failure).  
37  
38  
39  
40  
41  
42  
43  
44  
45  
46  
47  
48  
49  
50  
51  
52  
53  
54  
55  
56  
57  
58  
59  
60  
However, we believe that randomisation, as stratified on modified Marshall scoring system  
(thus distinguishing patients with absent, moderate and severe organ failure), among other  
parameters, should ensure similar distribution of the severity of AP in both arms. Second, we  
acknowledge that the EPIPAN trial does not include precise (sub)protocols addressing every  
single aspect of the management of patients with AP (e.g., enteral feeding, its initiation, route  
of administration and dose), because it was believed that it would have hamper inclusions of  
patient and the feasibility of this pragmatic study. Instead, current guidelines for the  
management of AP are actively encouraged among study participants.[10,13,29–31]

1  
2  
3 Although the implementation of consensual recommendations will not be specifically  
4 assessed while the study is still ongoing, and as it may impact the findings and their  
5 interpretation, adherence of physicians from participating centres to these guidelines will be  
6 analysed after study completion. Third, this trial, whatever its results, will not address the  
7 question of the selection of patients with AP who may best benefit of EA. However, analyses  
8 of clinical and biological subphenotypes of patients included in the trial, and their responses  
9 to EA, should possibly inform on how to better select patients for future studies. Fourth,  
10 another limitation may include the limited generalizability of the results obtained from this  
11 study because EA is a technique that is restricted to experienced anaesthesiologists and  
12 intensivists. Fifth, the expected between-group difference in primary endpoint, as  
13 extrapolated from the study from Jung et al.[12], may be debatable and considered as too  
14 optimistic. Although we acknowledge that this choice is debatable, we believe that it is an  
15 acceptable compromise between study feasibility and clinical relevance, while ensuring the  
16 building of the largest cohort of critically ill patients with acute pancreatitis to date. Finally,  
17 some could highlight potential risks associated with EA in critically ill patients with  
18 hyperinflammatory conditions such as AP[38,54,55], although previous studies suggest good  
19 feasibility and safety of EA in this setting. Findings from the EPIPAN trial will undoubtedly  
20 provide new data on both the efficacy and the safety of EA during clinical AP.  
21  
22  
23  
24  
25  
26  
27  
28  
29  
30  
31  
32  
33  
34  
35  
36  
37  
38  
39  
40  
41  
42

43 This study also has several strengths. First, it is to our knowledge the largest  
44 randomised controlled trial in critically ill patients with AP. Even in case of “negative”  
45 results, data from this trial will contribute to a better understanding of the characteristics,  
46 management and prognosis of ICU patients with AP. Second, it is the first trial powered to  
47 specifically assess the effects of EA on major patient outcomes such as respiratory outcomes  
48 and 30-day mortality. In addition, other strengths are the inclusions performed around the  
49 clock, nights and weekend included as a routine clinical practice. Third, this study includes  
50  
51  
52  
53  
54  
55  
56  
57  
58  
59  
60

1  
2  
3 the constitution of a biobank of plasma and urine sampled over the first week after inclusion,  
4  
5 in order to assess biological markers of inflammation, lung injury and renal failure and the  
6  
7 effects of EA on such markers. Finally, and despite an open-label design, one strength of the  
8  
9 study is that final assessors of clinical and biological data who will be in charge of statistical  
10  
11 analyses and outcome assessment, remain masked as to the subjects' assigned group, thus  
12  
13 limiting bias.  
14  
15

16  
17  
18 In conclusion, the EPIPAN trial is an investigator-initiated pragmatic multicentre  
19  
20 randomised controlled trial powered to test the hypothesis that adding thoracic EA to  
21  
22 standard care in comparison to standard care alone may improve respiratory outcomes, i.e.  
23  
24 increase the number of ventilator-free days at day 30, in critically ill patients with AP. The  
25  
26 EPIPAN trial will also assess the effects of combined EA and standard care on main  
27  
28 complications of AP and other major patient outcomes.  
29  
30  
31  
32  
33  
34  
35  
36  
37  
38  
39  
40  
41  
42  
43  
44  
45  
46  
47  
48  
49  
50  
51  
52  
53  
54  
55  
56  
57  
58  
59  
60

## AUTHORS CONTRIBUTIONS TO THE STUDY

MJ takes responsibility for the content of the manuscript. MJ, SB, EI, BP, EC, DM and JMC were involved in the conception, hypotheses delineation, and design of the study, acquisition and analysis of the data, in writing the article and in its revision prior to submission.

All other authors were involved in the design of the study, acquisition and analysis of the data, in writing the article and in its revision prior to submission.

## REFERENCES

- 1 Chan A-W, Tetzlaff JM, Gøtzsche PC, *et al.* SPIRIT 2013 explanation and elaboration: guidance for protocols of clinical trials. *BMJ* 2013;**346**:e7586.
- 2 Peery AF, Dellon ES, Lund J, *et al.* Burden of gastrointestinal disease in the United States: 2012 update. *Gastroenterology* 2012;**143**:1179–87.e1–3.
- 3 Swaroop VS, Chari ST, Clain JE. Severe acute pancreatitis. *JAMA* 2004;**291**:2865–8.
- 4 Lankisch PG, Apte M, Banks PA. Acute pancreatitis. *Lancet* 2015;**386**:85–96.
- 5 Acute Respiratory Distress Syndrome: The Berlin Definition. *JAMA* 2012;**307**. doi:10.1001/jama.2012.5669
- 6 Whitcomb DC. Clinical practice. Acute pancreatitis. *N Engl J Med* 2006;**354**:2142–50.
- 7 Baron TH, Morgan DE. Acute necrotizing pancreatitis. *N Engl J Med* 1999;**340**:1412–7.
- 8 Dombernowsky T, Kristensen MØ, Rysgaard S, *et al.* Risk factors for and impact of respiratory failure on mortality in the early phase of acute pancreatitis. *Pancreatology* Published Online First: 8 July 2016. doi:10.1016/j.pan.2016.06.664
- 9 Klar E, Schratt W, Foitzik T, *et al.* Impact of microcirculatory flow pattern changes on the development of acute edematous and necrotizing pancreatitis in rabbit pancreas. *Dig Dis Sci* 1994;**39**:2639–44.
- 10 Banks PA, Bollen TL, Dervenis C, *et al.* Classification of acute pancreatitis--2012: revision of the Atlanta classification and definitions by international consensus. *Gut*

- 1  
2  
3 2013;**62**:102–11.  
4  
5  
6 11 Lund H, Tønnesen H, Tønnesen MH, *et al.* Long-term recurrence and death rates after  
7 acute pancreatitis. *Scand J Gastroenterol* 2006;**41**:234–8.  
8  
9  
10  
11 12 Jung B, Carr J, Chanques G, *et al.* [Severe and acute pancreatitis admitted in intensive  
12 care: a prospective epidemiological multiple centre study using CClin network  
13 database]. *Ann Fr Anesth Reanim* 2011;**30**:105–12.  
14  
15  
16  
17 13 Tenner S, Baillie J, DeWitt J, *et al.* American College of Gastroenterology guideline:  
18 management of acute pancreatitis. *Am J Gastroenterol* 2013;**108**:1400–15; 1416.  
19  
20  
21  
22 14 Clemente A, Carli F. The physiological effects of thoracic epidural anesthesia and  
23 analgesia on the cardiovascular, respiratory and gastrointestinal systems. *Minerva*  
24 *Anesthesiol* 2008;**74**:549–63.  
25  
26  
27  
28  
29 15 Bardia A, Sood A, Mahmood F, *et al.* Combined Epidural-General Anesthesia vs  
30 General Anesthesia Alone for Elective Abdominal Aortic Aneurysm Repair. *JAMA Surg*  
31 Published Online First: 7 September 2016. doi:10.1001/jamasurg.2016.2733  
32  
33  
34  
35  
36  
37  
38  
39 16 Von Dossow V, Welte M, Zaune U, *et al.* Thoracic epidural anesthesia combined with  
40 general anesthesia: the preferred anesthetic technique for thoracic surgery. *Anesth Analg*  
41 2001;**92**:848–54.  
42  
43  
44  
45  
46  
47 17 Rodgers A, Walker N, Schug S, *et al.* Reduction of postoperative mortality and  
48 morbidity with epidural or spinal anaesthesia: results from overview of randomised  
49 trials. *BMJ* 2000;**321**:1493.  
50  
51  
52  
53  
54  
55 18 Jabaudon M, Chabanne R, Sossou A, *et al.* Epidural analgesia in the intensive care unit:  
56  
57  
58  
59  
60

- 1  
2  
3 An observational series of 121 patients. *Anaesth Crit Care Pain Med* 2015;**34**:217–23.  
4  
5  
6 19 Bernhardt A, Kortgen A, Niesel HC, *et al.* [Using epidural anesthesia in patients with  
7 acute pancreatitis--prospective study of 121 patients]. *Anaesthesiol Reanim* 2002;**27**:16–  
8 22.  
9  
10  
11  
12  
13 20 Sadowski SM, Andres A, Morel P, *et al.* Epidural anesthesia improves pancreatic  
14 perfusion and decreases the severity of acute pancreatitis. *World J Gastroenterol*  
15 2015;**21**:12448–56.  
16  
17  
18  
19 21 Windisch O, Heidegger C-P, Giraud R, *et al.* Thoracic epidural analgesia: a new  
20 approach for the treatment of acute pancreatitis? *Crit Care* 2016;**20**:116.  
21  
22  
23  
24 22 Demirag A, Pastor CM, Morel P, *et al.* Epidural anaesthesia restores pancreatic  
25 microcirculation and decreases the severity of acute pancreatitis. *World J Gastroenterol*  
26 2006;**12**:915–20.  
27  
28  
29  
30 23 Bachmann KA, Trepte CJC, Tomkötter L, *et al.* Effects of thoracic epidural anesthesia  
31 on survival and microcirculation in severe acute pancreatitis: a randomized experimental  
32 trial. *Crit Care* 2013;**17**:R281.  
33  
34  
35  
36 24 Ai K, Kotake Y, Satoh T, *et al.* Epidural anesthesia retards intestinal acidosis and  
37 reduces portal vein endotoxin concentrations during progressive hypoxia in rabbits.  
38 *Anesthesiology* 2001;**94**:263–9.  
39  
40  
41  
42 25 Freise H, Lauer S, Anthonsen S, *et al.* Thoracic epidural analgesia augments ileal  
43 mucosal capillary perfusion and improves survival in severe acute pancreatitis in rats.  
44 *Anesthesiology* 2006;**105**:354–9.  
45  
46  
47  
48  
49  
50  
51  
52  
53  
54  
55  
56  
57  
58  
59  
60



- 1  
2  
3 26 Freise H, Lauer S, Konietzny E, *et al.* Hepatic effects of thoracic epidural analgesia in  
4 experimental severe acute pancreatitis. *Anesthesiology* 2009;**111**:1249–56.  
5  
6  
7  
8 27 Enigk F, Wagner A, Samapati R, *et al.* Thoracic epidural anesthesia decreases  
9 endotoxin-induced endothelial injury. *BMC Anesthesiol* 2014;**14**:23.  
10  
11  
12  
13 28 Schäper J, Wagner A, Enigk F, *et al.* Regional sympathetic blockade attenuates  
14 activation of intestinal macrophages and reduces gut barrier failure. *Anesthesiology*  
15 2013;**118**:134–42.  
16  
17  
18  
19 29 Greenberg JA, Hsu J, Bawazeer M, *et al.* Clinical practice guideline: management of  
20 acute pancreatitis. *Can J Surg* 2016;**59**:128–40.  
21  
22  
23  
24 30 Zerem E. Treatment of severe acute pancreatitis and its complications. *World J*  
25 *Gastroenterol* 2014;**20**:13879–92.  
26  
27  
28  
29 31 Working Group IAP/APA Acute Pancreatitis Guidelines. IAP/APA evidence-based  
30 guidelines for the management of acute pancreatitis. *Pancreatology* 2013;**13**:e1–15.  
31  
32  
33 32 Dellinger RP, Levy MM, Rhodes A, *et al.* Surviving sepsis campaign: international  
34 guidelines for management of severe sepsis and septic shock: 2012. *Crit Care Med*  
35 2013;**41**:580–637.  
36  
37  
38  
39 33 Boles J-M, Bion J, Connors A, *et al.* Weaning from mechanical ventilation. *Eur Respir J*  
40 2007;**29**:1033–56.  
41  
42  
43  
44 34 Payen JF, Bru O, Bosson JL, *et al.* Assessing pain in critically ill sedated patients by  
45 using a behavioral pain scale. *Crit Care Med* 2001;**29**:2258–63.  
46  
47  
48  
49 35 Aïssaoui Y, Zeggwagh AA, Zekraoui A, *et al.* Validation of a behavioral pain scale in  
50  
51  
52  
53  
54  
55  
56  
57  
58  
59  
60

- 1  
2  
3 critically ill, sedated, and mechanically ventilated patients. *Anesth Analg*  
4  
5 2005;**101**:1470–6.  
6  
7  
8  
9 36 WHO's cancer pain ladder for adults.  
10 2013.<http://www.who.int/cancer/palliative/painladder/en/> (accessed 6 Oct2016).  
11  
12  
13  
14 37 Wu CL, Cohen SR, Richman JM, *et al*. Efficacy of postoperative patient-controlled and  
15 continuous infusion epidural analgesia versus intravenous patient-controlled analgesia  
16 with opioids: a meta-analysis. *Anesthesiology* 2005;**103**:1079–88; quiz 1109–10.  
17  
18  
19  
20  
21 38 Figueiredo S, Benhamou D. Epidural analgesia in ICU: Useful and effective probably,  
22 safe maybe. *Anaesth Crit Care Pain Med* 2015;**34**:185–6.  
23  
24  
25  
26  
27 39 Kellum JA, Lameire N, KDIGO AKI Guideline Work Group. Diagnosis, evaluation, and  
28 management of acute kidney injury: a KDIGO summary (Part 1). *Crit Care*  
29 2013;**17**:204.  
30  
31  
32  
33  
34 40 Sessler CN, Gosnell MS, Grap MJ, *et al*. The Richmond Agitation-Sedation Scale:  
35 validity and reliability in adult intensive care unit patients. *Am J Respir Crit Care Med*  
36 2002;**166**:1338–44.  
37  
38  
39  
40  
41 41 Ely EW, Truman B, Shintani A, *et al*. Monitoring sedation status over time in ICU  
42 patients: reliability and validity of the Richmond Agitation-Sedation Scale (RASS).  
43 *JAMA* 2003;**289**:2983–91.  
44  
45  
46  
47  
48  
49 42 Zhang H, Neuhöfer P, Song L, *et al*. IL-6 trans-signaling promotes pancreatitis-  
50 associated lung injury and lethality. *J Clin Invest* 2013;**123**:1019–31.  
51  
52  
53  
54  
55 43 Uchida T, Shirasawa M, Ware LB, *et al*. Receptor for advanced glycation end-products  
56  
57  
58  
59  
60

- 1  
2  
3 is a marker of type I cell injury in acute lung injury. *Am J Respir Crit Care Med*  
4  
5 2006;**173**:1008–15.  
6  
7  
8  
9 44 Jabaudon M, Blondonnet R, Roszyk L, *et al*. Soluble Receptor for Advanced Glycation  
10 End-Products Predicts Impaired Alveolar Fluid Clearance in Acute Respiratory Distress  
11 Syndrome. *Am J Respir Crit Care Med* 2015;**192**:191–9.  
12  
13  
14  
15  
16 45 Haase M, Bellomo R, Devarajan P, *et al*. Accuracy of neutrophil gelatinase-associated  
17 lipocalin (NGAL) in diagnosis and prognosis in acute kidney injury: a systematic review  
18 and meta-analysis. *Am J Kidney Dis* 2009;**54**:1012–24.  
19  
20  
21  
22  
23  
24 46 Constantin J-M, Futier E, Perbet S, *et al*. Plasma neutrophil gelatinase-associated  
25 lipocalin is an early marker of acute kidney injury in adult critically ill patients: a  
26 prospective study. *J Crit Care* 2010;**25**:176.e1–6.  
27  
28  
29  
30  
31 47 Vijayan A, Faubel S, Askenazi DJ, *et al*. Clinical Use of the Urine Biomarker [TIMP-2]  
32 × [IGFBP7] for Acute Kidney Injury Risk Assessment. *Am J Kidney Dis* 2016;**68**:19–  
33  
34 28.  
35  
36  
37  
38  
39 48 Marshall JC, Cook DJ, Christou NV, *et al*. Multiple organ dysfunction score: a reliable  
40 descriptor of a complex clinical outcome. *Crit Care Med* 1995;**23**:1638–52.  
41  
42  
43  
44 49 Working Party of the British Society of Gastroenterology, Association of Surgeons of  
45 Great Britain and Ireland, Pancreatic Society of Great Britain and Ireland, *et al*. UK  
46 guidelines for the management of acute pancreatitis. *Gut* 2005;**54 Suppl 3**:iii1–9.  
47  
48  
49  
50  
51 50 Jouve P, Bazin J-E, Petit A, *et al*. Epidural versus continuous preperitoneal analgesia  
52 during fast-track open colorectal surgery: a randomized controlled trial. *Anesthesiology*  
53  
54 2013;**118**:622–30.  
55  
56  
57  
58  
59  
60

- 1  
2  
3 51 Harris PA, Taylor R, Thielke R, *et al.* Research electronic data capture (REDCap)--a  
4 metadata-driven methodology and workflow process for providing translational research  
5 informatics support. *J Biomed Inform* 2009;**42**:377–81.  
6  
7  
8  
9  
10 52 Sauder P, Andreoletti M, Cambonie G, *et al.* Sédation-analgésie en réanimation  
11 (nouveau-né exclu). *Annales Françaises d'Anesthésie et de Réanimation* 2008;**27**:541–  
12 51.  
13  
14  
15  
16  
17  
18 53 Richards ER, Kabir SI, McNaught C-E, *et al.* Effect of thoracic epidural anaesthesia on  
19 splanchnic blood flow. *Br J Surg* 2013;**100**:316–21.  
20  
21  
22  
23 54 Freise H, Van Aken HK. Risks and benefits of thoracic epidural anaesthesia. *Br J*  
24 *Anaesth* 2011;**107**:859–68.  
25  
26  
27  
28  
29 55 Low JHS. Survey of epidural analgesia management in general intensive care units in  
30 England. *Acta Anaesthesiol Scand* 2002;**46**:799–805.  
31  
32  
33  
34  
35  
36  
37  
38  
39  
40  
41  
42  
43  
44  
45  
46  
47  
48  
49  
50  
51  
52  
53  
54  
55  
56  
57  
58  
59  
60

1  
2  
3 **FIGURE LEGENDS**  
4  
5  
6

7 **FIGURE 1.** CONSORT diagram of the EPIPAN trial illustrating the randomisation and flow  
8 of patients in the study.  
9  
10  
11  
12  
13  
14  
15  
16  
17  
18  
19  
20  
21  
22  
23  
24  
25  
26  
27  
28  
29  
30  
31  
32  
33  
34  
35  
36  
37  
38  
39  
40  
41  
42  
43  
44  
45  
46  
47  
48  
49  
50  
51  
52  
53  
54  
55  
56  
57  
58  
59  
60

For peer review only

## TABLE

|                                                                                 | Inclusion (day 0) | Day 1 | Day 2 | Day 3 | Day 4 | Day 5 | Day 6 | Day 7 | Day 15 | Day 30 |
|---------------------------------------------------------------------------------|-------------------|-------|-------|-------|-------|-------|-------|-------|--------|--------|
| Informed consent                                                                | X                 |       |       |       |       |       |       |       |        |        |
| Eligibility: check inclusion and exclusion criteria                             | X                 |       |       |       |       |       |       |       |        |        |
| Randomisation                                                                   | X                 |       |       |       |       |       |       |       |        |        |
| Filling of case report forms (including data on EA in the interventional group) | X                 | X     | X     | X     | X     | X     | X     | X     | X      | X      |
| Sampling of blood and urine specimens                                           | X                 |       | X     |       |       |       |       | X     |        |        |
| Complications of acute pancreatitis and survival status                         |                   |       |       |       |       |       |       |       | X      | X      |
| End of study                                                                    |                   |       |       |       |       |       |       |       |        | X      |

Table 1. Participant timeline

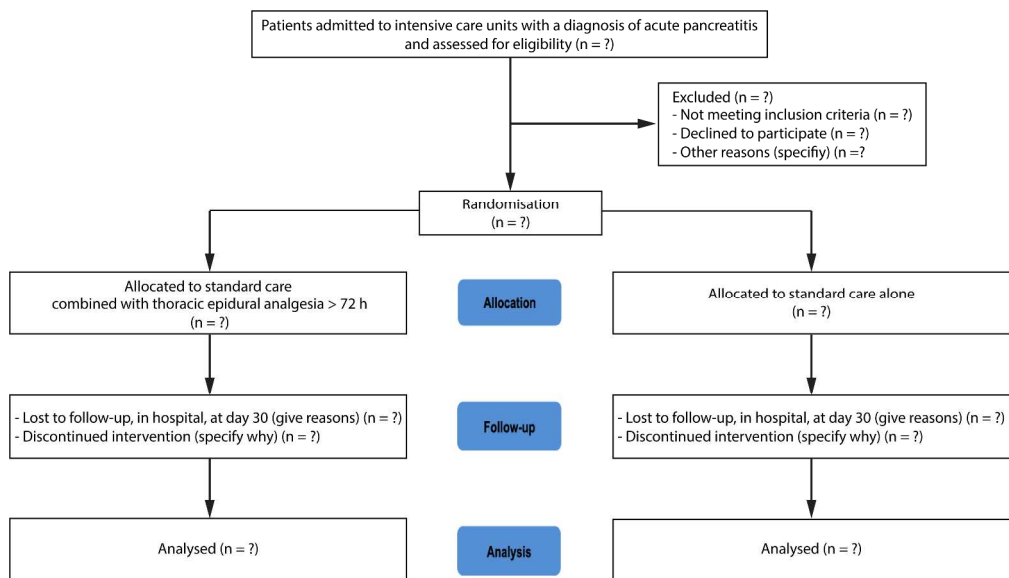

FIGURE 1. CONSORT diagram of the EPIPAN trial illustrating the randomisation and flow of patients in the study.

275x157mm (300 x 300 DPI)

Review only

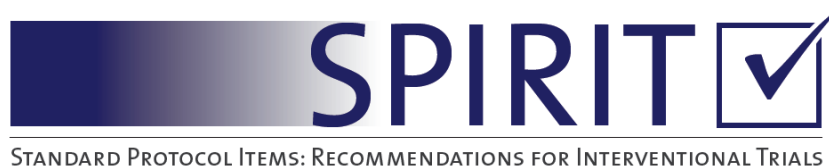

SPIRIT 2013 Checklist: Recommended items to address in a clinical trial protocol and related documents\*

| Section/item                      | Item No | Description                                                                                                                                                                                                                                                                                                            |
|-----------------------------------|---------|------------------------------------------------------------------------------------------------------------------------------------------------------------------------------------------------------------------------------------------------------------------------------------------------------------------------|
| <b>Administrative information</b> |         |                                                                                                                                                                                                                                                                                                                        |
| Title                             | 1       | Descriptive title identifying the study design, population, interventions, and, if applicable, trial acronym – <a href="#">PAGE 1</a>                                                                                                                                                                                  |
| Trial registration                | 2a      | Trial identifier and registry name. If not yet registered, name of intended registry – <a href="#">PAGES 6 and 21</a>                                                                                                                                                                                                  |
|                                   | 2b      | All items from the World Health Organization Trial Registration Data Set – <a href="#">PAGE 21</a>                                                                                                                                                                                                                     |
| Protocol version                  | 3       | Date and version identifier – <a href="#">PAGE 21</a>                                                                                                                                                                                                                                                                  |
| Funding                           | 4       | Sources and types of financial, material, and other support – <a href="#">PAGES 22-23</a>                                                                                                                                                                                                                              |
| Roles and responsibilities        | 5a      | Names, affiliations, and roles of protocol contributors – <a href="#">PAGES 1, 2 and 27</a>                                                                                                                                                                                                                            |
|                                   | 5b      | Name and contact information for the trial sponsor – <a href="#">PAGES 2 and 22</a>                                                                                                                                                                                                                                    |
|                                   | 5c      | Role of study sponsor and funders, if any, in study design; collection, management, analysis, and interpretation of data; writing of the report; and the decision to submit the report for publication, including whether they will have ultimate authority over any of these activities – <a href="#">PAGES 22-23</a> |
|                                   | 5d      | Composition, roles, and responsibilities of the coordinating centre, steering committee, endpoint adjudication committee, data management team, and other individuals or groups overseeing the trial, if applicable (see Item 21a for data monitoring committee) – <a href="#">PAGES 20-21</a>                         |
| <b>Introduction</b>               |         |                                                                                                                                                                                                                                                                                                                        |
| Background and rationale          | 6a      | Description of research question and justification for undertaking the trial, including summary of relevant studies (published and unpublished) examining benefits and harms for each intervention – <a href="#">PAGES 7-8-9</a>                                                                                       |
|                                   | 6b      | Explanation for choice of comparators – <a href="#">PAGES 8-9</a>                                                                                                                                                                                                                                                      |
| Objectives                        | 7       | Specific objectives or hypotheses – <a href="#">PAGES 9-10</a>                                                                                                                                                                                                                                                         |



1  
2  
3  
4  
5  
6  
7  
8  
9  
10  
11  
12  
13  
14  
15  
16  
17  
18  
19  
20  
21  
22  
23  
24  
25  
26  
27  
28  
29  
30  
31  
32  
33  
34  
35  
36  
37  
38  
39  
40  
41  
42  
43  
44  
45  
46  
47  
48  
49  
50  
51  
52  
53  
54  
55  
56  
57  
58  
59  
60

Trial design 8 Description of trial design including type of trial (eg, parallel group, crossover, factorial, single group), allocation ratio, and framework (eg, superiority, equivalence, noninferiority, exploratory) – [PAGE 10](#)

### Methods: Participants, interventions, and outcomes

Study setting 9 Description of study settings (eg, community clinic, academic hospital) and list of countries where data will be collected. Reference to where list of study sites can be obtained – [PAGE 10-11](#)

Eligibility criteria 10 Inclusion and exclusion criteria for participants. If applicable, eligibility criteria for study centres and individuals who will perform the interventions (eg, surgeons, psychotherapists) – [PAGE 11](#)

Interventions 11a Interventions for each group with sufficient detail to allow replication, including how and when they will be administered – [PAGES 11-12-13](#)

11b Criteria for discontinuing or modifying allocated interventions for a given trial participant (eg, drug dose change in response to harms, participant request, or improving/worsening disease) – [PAGES 21-22](#)

11c Strategies to improve adherence to intervention protocols, and any procedures for monitoring adherence (eg, drug tablet return, laboratory tests) – [PAGES 12-25-26](#)

11d Relevant concomitant care and interventions that are permitted or prohibited during the trial – [PAGES 11-12-13](#)

Outcomes 12 Primary, secondary, and other outcomes, including the specific measurement variable (eg, systolic blood pressure), analysis metric (eg, change from baseline, final value, time to event), method of aggregation (eg, median, proportion), and time point for each outcome. Explanation of the clinical relevance of chosen efficacy and harm outcomes is strongly recommended – [PAGES 13-14](#)

Participant timeline 13 Time schedule of enrolment, interventions (including any run-ins and washouts), assessments, and visits for participants. A schematic diagram is highly recommended (see Figure) – [PAGES 14 and Table 1](#)

Sample size 14 Estimated number of participants needed to achieve study objectives and how it was determined, including clinical and statistical assumptions supporting any sample size calculations – [PAGES 17 and 25](#)

1  
2 Recruitment 15 Strategies for achieving adequate participant enrolment to reach  
3 target sample size – [PAGES 14-15](#)  
4  
5  
6  
7  
8  
9

10 **Methods: Assignment of interventions (for controlled trials)**  
11

12 Allocation:

13  
14 Sequence generation 16a Method of generating the allocation sequence (eg, computer-  
15 generated random numbers), and list of any factors for stratification.  
16 To reduce predictability of a random sequence, details of any planned  
17 restriction (eg, blocking) should be provided in a separate document  
18 that is unavailable to those who enrol participants or assign  
19 interventions – [PAGE 15](#)  
20  
21

22  
23 Allocation concealment 16b Mechanism of implementing the allocation sequence (eg, central  
24 telephone; sequentially numbered, opaque, sealed envelopes),  
25 describing any steps to conceal the sequence until interventions are  
26 assigned – [PAGE 15](#)  
27

28  
29 Implementation 16c Who will generate the allocation sequence, who will enrol participants,  
30 and who will assign participants to interventions – [PAGE 15-16](#)  
31

32 Blinding (masking) 17a Who will be blinded after assignment to interventions (eg, trial  
33 participants, care providers, outcome assessors, data analysts), and  
34 how – [PAGES 16-17](#)  
35

36  
37 17b If blinded, circumstances under which unblinding is permissible, and  
38 procedure for revealing a participant's allocated intervention during  
39 the trial – [PAGE 16](#)  
40

41 **Methods: Data collection, management, and analysis**  
42

43 Data collection methods 18a Plans for assessment and collection of outcome, baseline, and other  
44 trial data, including any related processes to promote data quality (eg,  
45 duplicate measurements, training of assessors) and a description of  
46 study instruments (eg, questionnaires, laboratory tests) along with  
47 their reliability and validity, if known. Reference to where data  
48 collection forms can be found, if not in the protocol – [PAGES 17-18-](#)  
49 [19](#)  
50  
51

52  
53 18b Plans to promote participant retention and complete follow-up,  
54 including list of any outcome data to be collected for participants who  
55 discontinue or deviate from intervention protocols – [PAGE 17](#)  
56  
57  
58  
59  
60

|    |             |     |                                                                                   |
|----|-------------|-----|-----------------------------------------------------------------------------------|
| 1  |             |     |                                                                                   |
| 2  | Data        | 19  | Plans for data entry, coding, security, and storage, including any                |
| 3  | management  |     | related processes to promote data quality (eg, double data entry;                 |
| 4  |             |     | range checks for data values). Reference to where details of data                 |
| 5  |             |     | management procedures can be found, if not in the protocol – <a href="#">PAGE</a> |
| 6  |             |     | <a href="#">17</a>                                                                |
| 7  |             |     |                                                                                   |
| 8  |             |     |                                                                                   |
| 9  | Statistical | 20a | Statistical methods for analysing primary and secondary outcomes.                 |
| 10 | methods     |     | Reference to where other details of the statistical analysis plan can be          |
| 11 |             |     | found, if not in the protocol – <a href="#">PAGES 17-18-19</a>                    |
| 12 |             |     |                                                                                   |
| 13 |             | 20b | Methods for any additional analyses (eg, subgroup and adjusted                    |
| 14 |             |     | analyses) – <a href="#">PAGES 18-19</a>                                           |
| 15 |             |     |                                                                                   |
| 16 |             |     |                                                                                   |
| 17 |             | 20c | Definition of analysis population relating to protocol non-adherence              |
| 18 |             |     | (eg, as randomised analysis), and any statistical methods to handle               |
| 19 |             |     | missing data (eg, multiple imputation) – <a href="#">PAGES 17-18-19</a>           |
| 20 |             |     |                                                                                   |
| 21 |             |     |                                                                                   |
| 22 |             |     |                                                                                   |
| 23 |             |     |                                                                                   |

### Methods: Monitoring

|    |                 |     |                                                                                  |
|----|-----------------|-----|----------------------------------------------------------------------------------|
| 24 |                 |     |                                                                                  |
| 25 |                 |     |                                                                                  |
| 26 | Data monitoring | 21a | Composition of data monitoring committee (DMC); summary of its role              |
| 27 |                 |     | and reporting structure; statement of whether it is independent from             |
| 28 |                 |     | the sponsor and competing interests; and reference to where further              |
| 29 |                 |     | details about its charter can be found, if not in the protocol.                  |
| 30 |                 |     | Alternatively, an explanation of why a DMC is not needed – <a href="#">PAGES</a> |
| 31 |                 |     | <a href="#">21-22</a>                                                            |
| 32 |                 |     |                                                                                  |
| 33 |                 |     |                                                                                  |
| 34 |                 |     |                                                                                  |
| 35 |                 |     |                                                                                  |
| 36 |                 | 21b | Description of any interim analyses and stopping guidelines, including           |
| 37 |                 |     | who will have access to these interim results and make the final                 |
| 38 |                 |     | decision to terminate the trial – <a href="#">PAGES 18 and 21</a>                |
| 39 |                 |     |                                                                                  |
| 40 |                 |     |                                                                                  |
| 41 |                 |     |                                                                                  |
| 42 | Harms           | 22  | Plans for collecting, assessing, reporting, and managing solicited and           |
| 43 |                 |     | spontaneously reported adverse events and other unintended effects               |
| 44 |                 |     | of trial interventions or trial conduct – <a href="#">PAGES 20-21</a>            |
| 45 |                 |     |                                                                                  |
| 46 |                 |     |                                                                                  |
| 47 |                 |     |                                                                                  |
| 48 | Auditing        | 23  | Frequency and procedures for auditing trial conduct, if any, and                 |
| 49 |                 |     | whether the process will be independent from investigators and the               |
| 50 |                 |     | sponsor – <a href="#">PAGE 20</a>                                                |
| 51 |                 |     |                                                                                  |
| 52 |                 |     |                                                                                  |
| 53 |                 |     |                                                                                  |

### Ethics and dissemination

|    |                 |    |                                                                        |
|----|-----------------|----|------------------------------------------------------------------------|
| 54 |                 |    |                                                                        |
| 55 |                 |    |                                                                        |
| 56 | Research ethics | 24 | Plans for seeking research ethics committee/institutional review board |
| 57 | approval        |    | (REC/IRB) approval – <a href="#">PAGE 21-22</a>                        |
| 58 |                 |    |                                                                        |
| 59 |                 |    |                                                                        |
| 60 |                 |    |                                                                        |

|    |                   |     |                                                                                        |
|----|-------------------|-----|----------------------------------------------------------------------------------------|
| 1  |                   |     |                                                                                        |
| 2  | Protocol          | 25  | Plans for communicating important protocol modifications (eg,                          |
| 3  | amendments        |     | changes to eligibility criteria, outcomes, analyses) to relevant parties               |
| 4  |                   |     | (eg, investigators, REC/IRBs, trial participants, trial registries, journals,          |
| 5  |                   |     | regulators) – <a href="#">PAGE 23</a>                                                  |
| 6  |                   |     |                                                                                        |
| 7  |                   |     |                                                                                        |
| 8  | Consent or assent | 26a | Who will obtain informed consent or assent from potential trial                        |
| 9  |                   |     | participants or authorised surrogates, and how (see Item 32) – <a href="#">PAGE</a>    |
| 10 |                   |     | <a href="#">23</a>                                                                     |
| 11 |                   |     |                                                                                        |
| 12 |                   | 26b | Additional consent provisions for collection and use of participant data               |
| 13 |                   |     | and biological specimens in ancillary studies, if applicable – <a href="#">PAGE 23</a> |
| 14 |                   |     |                                                                                        |
| 15 |                   |     |                                                                                        |
| 16 | Confidentiality   | 27  | How personal information about potential and enrolled participants will                |
| 17 |                   |     | be collected, shared, and maintained in order to protect confidentiality               |
| 18 |                   |     | before, during, and after the trial – <a href="#">PAGES 22-23</a>                      |
| 19 |                   |     |                                                                                        |
| 20 |                   |     |                                                                                        |
| 21 | Declaration of    | 28  | Financial and other competing interests for principal investigators for                |
| 22 | interests         |     | the overall trial and each study site – <a href="#">PAGE 23</a>                        |
| 23 |                   |     |                                                                                        |
| 24 | Access to data    | 29  | Statement of who will have access to the final trial dataset, and                      |
| 25 |                   |     | disclosure of contractual agreements that limit such access for                        |
| 26 |                   |     | investigators – <a href="#">PAGE 23</a>                                                |
| 27 |                   |     |                                                                                        |
| 28 |                   |     |                                                                                        |
| 29 | Ancillary and     | 30  | Provisions, if any, for ancillary and post-trial care, and for                         |
| 30 | post-trial care   |     | compensation to those who suffer harm from trial participation –                       |
| 31 |                   |     | <a href="#">PAGE 23</a>                                                                |
| 32 |                   |     |                                                                                        |
| 33 |                   |     |                                                                                        |
| 34 | Dissemination     | 31a | Plans for investigators and sponsor to communicate trial results to                    |
| 35 | policy            |     | participants, healthcare professionals, the public, and other relevant                 |
| 36 |                   |     | groups (eg, via publication, reporting in results databases, or other                  |
| 37 |                   |     | data sharing arrangements), including any publication restrictions –                   |
| 38 |                   |     | <a href="#">PAGES 5 and 23</a>                                                         |
| 39 |                   |     |                                                                                        |
| 40 |                   |     |                                                                                        |
| 41 |                   | 31b | Authorship eligibility guidelines and any intended use of professional                 |
| 42 |                   |     | writers – <a href="#">PAGE 23</a>                                                      |
| 43 |                   |     |                                                                                        |
| 44 |                   | 31c | Plans, if any, for granting public access to the full protocol, participant-           |
| 45 |                   |     | level dataset, and statistical code – <a href="#">PAGE 23</a>                          |
| 46 |                   |     |                                                                                        |
| 47 |                   |     |                                                                                        |
| 48 | <b>Appendices</b> |     |                                                                                        |
| 49 |                   |     |                                                                                        |
| 50 | Informed consent  | 32  | Model consent form and other related documentation given to                            |
| 51 | materials         |     | participants and authorised surrogates – <a href="#">Appendix</a>                      |
| 52 |                   |     |                                                                                        |
| 53 | Biological        | 33  | Plans for collection, laboratory evaluation, and storage of biological                 |
| 54 | specimens         |     | specimens for genetic or molecular analysis in the current trial and for               |
| 55 |                   |     | future use in ancillary studies, if applicable – <a href="#">Table 1</a>               |
| 56 |                   |     |                                                                                        |

\*It is strongly recommended that this checklist be read in conjunction with the SPIRIT 2013 Explanation & Elaboration for important clarification on the items. Amendments to the protocol should be tracked and dated. The SPIRIT checklist is copyrighted by the SPIRIT Group under the Creative Commons "[Attribution-NonCommercial-NoDerivs 3.0 Unported](#)" license.
